# Supplementary material
Source: publisher figshare collection journal article supplement (https://acs.figshare.com/ndownloader/files/9711808)
Supplement: Supplementary file 1 [file 9711808]

data_P21_a

_audit_update_record
;
2016-12-20 # Formatted by publCIF

;
_publcif_datablock.id '{dd60d26f-9bf1-4a77-8778-19d911b37c34}'

_publ_section_exptl_refinement
;
(type here to add)
;

_publ_section_exptl_prep
;
(type here to add)
;

_publ_manuscript_text
;
(type here to add)
;
#============================================================================== 
# PH-06
#==============================================================================
_audit_creation_date        '2016-12-20'
_audit_creation_method            SHELXL-2014 


#   SUBMISSION DETAILS

_publ_contact_author_name            ' '
_publ_contact_author_address            
;
School of Pharmacy, Tokyo University of Pharmacy and Life Sciences, 
1432-1 Horinouchi, Hachioji, Tokyo 192-0392, Japan 
;
_publ_contact_author_email           ' '
_publ_contact_author_fax             ?
_publ_contact_author_phone           ?

_publ_requested_journal              ' '
_publ_requested_category             ?   
_publ_contact_letter
?
_publ_section_title
;
Title PH-06
;
_publ_section_abstract
;
(type here to add)
;
_publ_section_comment
;
 
; 

loop_
	_publ_author_name
        _publ_author_address
?               
;
School of Pharmacy, Tokyo University of Pharmacy and Life Sciences, 
1432-1 Horinouchi, Hachioji, Tokyo 192-0392, Japan
;

#==============================================================================

#  TEXT

#==============================================================================

_publ_section_acknowledgements
;
?
;
_publ_section_references

;
Bruker, A. X. S. "<i>APEX2</i>, Software Suite for Crystallographic Programs.
version 2014/11, " Bruker AXS Inc., Madison, WI, USA (2014).

Bruker, A. X. S. "<i>SAINT</i>, program for integration of the intensity of
reflections and scaling, V8.34a "Bruker AXS Inc., Madison,WI, USA
(1997--2013).

G. M. Sheldrick, "<i>SADABS</i>, Program for the empirical absorption
correction of area detector data, version 2014/2."University of G\"ottingen,
Germany (2014).

G. M. Sheldrick, "<i>SHELXL2014</i>." Program for Refinement of Crystal
Structures, University of G\"ottingen and Bruker AXS, Germany (2014).

G. M. Sheldrick, "<i>SHELXTL2013</i>." Program for crystal structure solution,
University of G\"ottingen and Bruker AXS, Germany (2013).

A.L.Spek (2003). "<i>PLATON</i>, A Multipurpose Crystallographic Tool." Utrecht
University, Utrecht, The Netherlands. or A. L. Spek, J. Appl. Cryst., 36, 7-13
(2003).

H. D. FLACK, Acta Cryst., A39, 876-881 (1983).
;

#==============================================================================

#  CHEMICAL DATA

#==============================================================================

_chemical_name_systematic         ?
_chemical_name_common             ?
_chemical_melting_point           ?
_chemical_formula_moiety          'C15 H26 O2'
_chemical_formula_sum             'C15 H26 O2' 
_chemical_formula_weight          238.36
_chemical_formula_structural         ?
_chemical_formula_analytical         ?
_chemical_absolute_configuration     unk

loop_
 _atom_type_symbol
 _atom_type_description
 _atom_type_scat_dispersion_real
 _atom_type_scat_dispersion_imag
 _atom_type_scat_source
 'C'  'C'   0.0033   0.0016
 'International Tables Vol C Tables 4.2.6.8 and 6.1.1.4'
 'H'  'H'   0.0000   0.0000
 'International Tables Vol C Tables 4.2.6.8 and 6.1.1.4'
 'O'  'O'   0.0106   0.0060
 'International Tables Vol C Tables 4.2.6.8 and 6.1.1.4'

#==============================================================================

#   CRYSTAL DATA

#==============================================================================

 
_space_group_crystal_system       monoclinic
_space_group_IT_number            4
_space_group_name_H-M_alt         'P 21'
_space_group_name_Hall            'P 2yb'
 
_shelx_space_group_comment
;
The symmetry employed for this shelxl refinement is uniquely defined
by the following loop, which should always be used as a source of
symmetry information in preference to the above space-group names.
They are only intended as comments.
;
 
loop_
 _space_group_symop_operation_xyz
 'x, y, z'
 '-x, y+1/2, -z'
 
_cell_length_a                    7.8728(9)
_cell_length_b                    6.9222(8)
_cell_length_c                    13.1511(15)
_cell_angle_alpha                 90
_cell_angle_beta                  96.888(2)
_cell_angle_gamma                 90
_cell_volume                      711.52(14)
_cell_formula_units_Z             2
_cell_measurement_temperature     90
_cell_measurement_reflns_used      1741
_cell_measurement_theta_min        2.61
_cell_measurement_theta_max       27.43
 
_exptl_crystal_description          'block'
 
_exptl_crystal_colour               'colourless'
 
_exptl_crystal_density_meas       ?
_exptl_crystal_density_method     ?
_exptl_crystal_density_diffrn     1.113          
_exptl_crystal_F_000              264
_exptl_transmission_factor_min    ?
_exptl_transmission_factor_max    ?
_exptl_crystal_size_max           0.188
_exptl_crystal_size_mid           0.078
_exptl_crystal_size_min           0.075
_exptl_absorpt_coefficient_mu     0.071
_shelx_estimated_absorpt_T_min    0.987
_shelx_estimated_absorpt_T_max    0.995
_exptl_absorpt_correction_type      numerical
 
_exptl_absorpt_correction_T_min  0.909 
_exptl_absorpt_correction_T_max  0.995 
_exptl_absorpt_process_details      
;
Crystal Faces plugin in Bruker APEX2 software
;
 
#==============================================================================

#   EXPERIMENTAL DATA

#==============================================================================

_diffrn_ambient_temperature       90
_diffrn_radiation_wavelength      0.71073
_diffrn_radiation_type            MoK\a
_diffrn_source                      'rotating anode' 
_diffrn_source_type                 'Bruker TXS fine-focus rotating anode'
_diffrn_radiation_monochromator     'Bruker Helios multilayer confocal mirror' 
_diffrn_measurement_device_type     'Bruker SMART APEX II CCD' 
_diffrn_measurement_method          'phi and omega scans' 
_diffrn_detector_area_resol_mean    8.333

_diffrn_reflns_number             3500
_diffrn_reflns_av_unetI/netI      0.0320
_diffrn_reflns_av_R_equivalents   0.0167
_diffrn_reflns_limit_h_min        -8
_diffrn_reflns_limit_h_max        9
_diffrn_reflns_limit_k_min        -8
_diffrn_reflns_limit_k_max        8
_diffrn_reflns_limit_l_min        -15
_diffrn_reflns_limit_l_max        12
_diffrn_reflns_theta_min          2.606
_diffrn_reflns_theta_max          25.023
_diffrn_reflns_theta_full         25.000
_diffrn_measured_fraction_theta_max   0.993
_diffrn_measured_fraction_theta_full  0.993
_diffrn_reflns_Laue_measured_fraction_max    0.993
_diffrn_reflns_Laue_measured_fraction_full   0.993
_diffrn_reflns_point_group_measured_fraction_max   0.919
_reflns_number_total              2329
_reflns_number_gt                 2196
_reflns_threshold_expression      'I > 2\s(I)'
_reflns_Friedel_coverage          0.696
_reflns_Friedel_fraction_max      0.830
_reflns_Friedel_fraction_full     0.831
 
_reflns_special_details
;
 Reflections were merged by SHELXL according to the crystal
 class for the calculation of statistics and refinement.
 
 _reflns_Friedel_fraction is defined as the number of unique
 Friedel pairs measured divided by the number that would be
 possible theoretically, ignoring centric projections and
 systematic absences.
;
 
_computing_data_collection  'APEX2 V2014.11-0 (Bruker AXS Inc.,2014)'
_computing_cell_refinement   'APEX2 V2014.11-0 (Bruker AXS Inc.,2014)'
_computing_data_reduction         'SAINT V8.34a (Bruker AXS Inc., 2013)'
_computing_structure_solution  'SHELXTL XT Intrinsic Phasing (Sheldrick, 2013)'
_computing_structure_refinement     'SHELXL-2014/7 (Sheldrick, 2014)'
_computing_molecular_graphics       'Platon (A.L.Spek, 2003)'
_computing_publication_material     
;
pubCIF (Westrip, 2010) and enCIFer (Allen et al. 2004)
;

_refine_special_details           ?
_refine_ls_structure_factor_coef  Fsqd
_refine_ls_matrix_type            full
_refine_ls_weighting_scheme       calc
_refine_ls_weighting_details
'w=1/[\s^2^(Fo^2^)+(0.0342P)^2^+0.1825P] where P=(Fo^2^+2Fc^2^)/3'
_atom_sites_solution_primary      ?
_atom_sites_solution_secondary    ?
_atom_sites_solution_hydrogens    mixed
_refine_ls_hydrogen_treatment     mixed
_refine_ls_extinction_method      none
_refine_ls_extinction_coef        .
_refine_ls_abs_structure_details
;
 Flack x determined using 856 quotients [(I+)-(I-)]/[(I+)+(I-)]
 (Parsons, Flack and Wagner, Acta Cryst. B69 (2013) 249-259).
;
_refine_ls_abs_structure_Flack    -0.6(7)
_refine_ls_number_reflns          2329
_refine_ls_number_parameters      164
_refine_ls_number_restraints      109
_refine_ls_R_factor_all           0.0375
_refine_ls_R_factor_gt            0.0349
_refine_ls_wR_factor_ref          0.0817
_refine_ls_wR_factor_gt           0.0799
_refine_ls_goodness_of_fit_ref    1.061
_refine_ls_restrained_S_all       1.136
_refine_ls_shift/su_max           0.000
_refine_ls_shift/su_mean          0.000
 
loop_
 _atom_site_label
 _atom_site_type_symbol
 _atom_site_fract_x
 _atom_site_fract_y
 _atom_site_fract_z
 _atom_site_U_iso_or_equiv
 _atom_site_adp_type
 _atom_site_occupancy
 _atom_site_site_symmetry_order  
 _atom_site_calc_flag
 _atom_site_refinement_flags_posn
 _atom_site_refinement_flags_adp
 _atom_site_refinement_flags_occupancy
 _atom_site_disorder_assembly
 _atom_site_disorder_group
C1 C 0.5798(3) 0.5187(3) 0.19377(17) 0.0171(4) Uani 1 1 d . U . . .
C2 C 0.6222(3) 0.6618(4) 0.28393(17) 0.0188(4) Uani 1 1 d . U . . .
H2 H 0.5151 0.7359 0.2907 0.023 Uiso 1 1 calc R U . . .
C3 C 0.7602(3) 0.8106(4) 0.26577(18) 0.0216(4) Uani 1 1 d . U . . .
H3A H 0.8618 0.7422 0.2462 0.026 Uiso 1 1 calc R U . . .
H3B H 0.7160 0.8959 0.2082 0.026 Uiso 1 1 calc R U . . .
C4 C 0.8124(3) 0.9317(4) 0.35910(18) 0.0228(4) Uani 1 1 d . U . . .
H4 H 0.8774 1.0449 0.3505 0.027 Uiso 1 1 calc R U . . .
C5 C 0.7746(3) 0.8927(4) 0.45301(19) 0.0249(4) Uani 1 1 d . U . . .
C6 C 0.6818(3) 0.7097(4) 0.47475(19) 0.0264(5) Uani 1 1 d . U . . .
H6A H 0.5636 0.7425 0.4873 0.032 Uiso 1 1 calc R U . . .
H6B H 0.7399 0.6498 0.5379 0.032 Uiso 1 1 calc R U . . .
C7 C 0.6744(3) 0.5634(4) 0.38729(18) 0.0231(4) Uani 1 1 d . U . . .
H7A H 0.5908 0.4608 0.3981 0.028 Uiso 1 1 calc R U . . .
H7B H 0.7881 0.5022 0.3870 0.028 Uiso 1 1 calc R U . . .
C8 C 0.4199(3) 0.4033(3) 0.20849(17) 0.0171(4) Uani 1 1 d . U . . .
H8 H 0.4297 0.3271 0.2735 0.020 Uiso 1 1 calc R U . . .
C9 C 0.3154(3) 0.3065(3) 0.12042(17) 0.0173(4) Uani 1 1 d . U . . .
H9 H 0.3514 0.3419 0.0524 0.021 Uiso 1 1 calc R U . . .
C10 C 0.2412(3) 0.4741(4) 0.17371(17) 0.0183(4) Uani 1 1 d . U . . .
H10A H 0.2287 0.5991 0.1370 0.022 Uiso 1 1 calc R U . . .
H10B H 0.1510 0.4460 0.2179 0.022 Uiso 1 1 calc R U . . .
C11 C 0.2504(3) 0.0999(3) 0.12458(17) 0.0183(4) Uani 1 1 d . U . . .
C12 C 0.2277(3) 0.0311(4) 0.23218(18) 0.0225(5) Uani 1 1 d . U . . .
H12A H 0.1793 -0.0995 0.2287 0.034 Uiso 1 1 calc R U . . .
H12B H 0.1503 0.1189 0.2626 0.034 Uiso 1 1 calc R U . . .
H12C H 0.3391 0.0296 0.2744 0.034 Uiso 1 1 calc R U . . .
C13 C 0.0841(3) 0.0783(4) 0.05357(18) 0.0230(5) Uani 1 1 d . U . . .
H13A H 0.1016 0.1205 -0.0155 0.034 Uiso 1 1 calc R U . . .
H13B H -0.0048 0.1579 0.0789 0.034 Uiso 1 1 calc R U . . .
H13C H 0.0483 -0.0574 0.0516 0.034 Uiso 1 1 calc R U . . .
C14 C 0.7247(3) 0.3777(4) 0.18129(18) 0.0207(5) Uani 1 1 d . U . . .
H14A H 0.6949 0.2999 0.1195 0.031 Uiso 1 1 calc R U . . .
H14B H 0.7422 0.2926 0.2412 0.031 Uiso 1 1 calc R U . . .
H14C H 0.8300 0.4500 0.1752 0.031 Uiso 1 1 calc R U . . .
C15 C 0.8235(3) 1.0245(4) 0.5426(2) 0.0309(6) Uani 1 1 d . U . . .
H15A H 0.8822 1.1385 0.5197 0.046 Uiso 1 1 calc R U . . .
H15B H 0.8999 0.9558 0.5949 0.046 Uiso 1 1 calc R U . . .
H15C H 0.7203 1.0650 0.5717 0.046 Uiso 1 1 calc R U . . .
O1 O 0.5532(2) 0.6247(2) 0.09897(12) 0.0175(4) Uani 1 1 d . U . . .
O2 O 0.3790(2) -0.0260(2) 0.08976(12) 0.0192(4) Uani 1 1 d . U . . .
H1O H 0.494(4) 0.711(5) 0.106(2) 0.023 Uiso 1 1 d . U . . .
H2O H 0.403(3) 0.027(4) 0.036(2) 0.023 Uiso 1 1 d . U . . .
 
loop_
 _atom_site_aniso_label
 _atom_site_aniso_U_11
 _atom_site_aniso_U_22
 _atom_site_aniso_U_33
 _atom_site_aniso_U_23
 _atom_site_aniso_U_13
 _atom_site_aniso_U_12
C1 0.0206(8) 0.0161(8) 0.0149(7) 0.0028(7) 0.0037(7) 0.0005(7)
C2 0.0207(7) 0.0196(8) 0.0164(7) 0.0022(7) 0.0028(6) -0.0017(7)
C3 0.0240(9) 0.0214(9) 0.0194(8) 0.0023(8) 0.0021(7) -0.0027(8)
C4 0.0226(9) 0.0238(9) 0.0214(8) 0.0015(8) 0.0012(7) -0.0036(8)
C5 0.0226(8) 0.0298(9) 0.0218(8) -0.0007(8) 0.0006(7) -0.0053(8)
C6 0.0266(9) 0.0322(10) 0.0200(8) 0.0012(8) 0.0009(8) -0.0087(8)
C7 0.0241(9) 0.0265(9) 0.0183(8) 0.0036(8) 0.0009(7) -0.0065(8)
C8 0.0204(7) 0.0150(8) 0.0161(7) 0.0007(7) 0.0035(6) 0.0012(7)
C9 0.0209(8) 0.0148(8) 0.0167(7) -0.0008(7) 0.0043(6) 0.0024(7)
C10 0.0200(8) 0.0160(9) 0.0192(8) -0.0018(8) 0.0037(7) 0.0013(8)
C11 0.0229(8) 0.0146(8) 0.0186(8) -0.0017(8) 0.0072(7) 0.0028(8)
C12 0.0296(12) 0.0174(12) 0.0225(11) -0.0019(10) 0.0110(10) -0.0031(10)
C13 0.0253(12) 0.0176(12) 0.0263(12) -0.0030(10) 0.0042(10) 0.0020(10)
C14 0.0226(11) 0.0184(11) 0.0218(11) 0.0032(10) 0.0058(9) 0.0024(10)
C15 0.0271(13) 0.0398(15) 0.0255(12) -0.0071(11) 0.0016(10) -0.0066(11)
O1 0.0245(9) 0.0142(9) 0.0147(8) 0.0023(7) 0.0060(6) 0.0039(7)
O2 0.0268(9) 0.0149(8) 0.0172(8) 0.0026(7) 0.0086(7) 0.0046(7)
 
_geom_special_details
;
 All esds (except the esd in the dihedral angle between two l.s. planes)
 are estimated using the full covariance matrix.  The cell esds are taken
 into account individually in the estimation of esds in distances, angles
 and torsion angles; correlations between esds in cell parameters are only
 used when they are defined by crystal symmetry.  An approximate (isotropic)
 treatment of cell esds is used for estimating esds involving l.s. planes.
;
 
loop_
 _geom_bond_atom_site_label_1
 _geom_bond_atom_site_label_2
 _geom_bond_distance
 _geom_bond_site_symmetry_2
 _geom_bond_publ_flag
C1 O1 1.440(3) . ?
C1 C8 1.522(3) . ?
C1 C14 1.525(3) . ?
C1 C2 1.551(3) . ?
C2 C7 1.532(3) . ?
C2 C3 1.536(3) . ?
C2 H2 1.0000 . ?
C3 C4 1.502(3) . ?
C3 H3A 0.9900 . ?
C3 H3B 0.9900 . ?
C4 C5 1.332(3) . ?
C4 H4 0.9500 . ?
C5 C15 1.503(4) . ?
C5 C6 1.507(4) . ?
C6 C7 1.528(4) . ?
C6 H6A 0.9900 . ?
C6 H6B 0.9900 . ?
C7 H7A 0.9900 . ?
C7 H7B 0.9900 . ?
C8 C9 1.496(3) . ?
C8 C10 1.508(3) . ?
C8 H8 1.0000 . ?
C9 C10 1.509(3) . ?
C9 C11 1.522(3) . ?
C9 H9 1.0000 . ?
C10 H10A 0.9900 . ?
C10 H10B 0.9900 . ?
C11 O2 1.451(3) . ?
C11 C13 1.522(3) . ?
C11 C12 1.524(3) . ?
C12 H12A 0.9800 . ?
C12 H12B 0.9800 . ?
C12 H12C 0.9800 . ?
C13 H13A 0.9800 . ?
C13 H13B 0.9800 . ?
C13 H13C 0.9800 . ?
C14 H14A 0.9800 . ?
C14 H14B 0.9800 . ?
C14 H14C 0.9800 . ?
C15 H15A 0.9800 . ?
C15 H15B 0.9800 . ?
C15 H15C 0.9800 . ?
O1 H1O 0.77(3) . ?
O2 H2O 0.84(3) . ?
 
loop_
 _geom_angle_atom_site_label_1
 _geom_angle_atom_site_label_2
 _geom_angle_atom_site_label_3
 _geom_angle
 _geom_angle_site_symmetry_1
 _geom_angle_site_symmetry_3
 _geom_angle_publ_flag
O1 C1 C8 109.93(18) . . ?
O1 C1 C14 105.42(17) . . ?
C8 C1 C14 108.6(2) . . ?
O1 C1 C2 109.39(18) . . ?
C8 C1 C2 110.09(18) . . ?
C14 C1 C2 113.30(19) . . ?
C7 C2 C3 108.45(19) . . ?
C7 C2 C1 113.9(2) . . ?
C3 C2 C1 113.65(18) . . ?
C7 C2 H2 106.8 . . ?
C3 C2 H2 106.8 . . ?
C1 C2 H2 106.8 . . ?
C4 C3 C2 112.11(19) . . ?
C4 C3 H3A 109.2 . . ?
C2 C3 H3A 109.2 . . ?
C4 C3 H3B 109.2 . . ?
C2 C3 H3B 109.2 . . ?
H3A C3 H3B 107.9 . . ?
C5 C4 C3 125.1(2) . . ?
C5 C4 H4 117.5 . . ?
C3 C4 H4 117.5 . . ?
C4 C5 C15 122.6(2) . . ?
C4 C5 C6 120.9(2) . . ?
C15 C5 C6 116.5(2) . . ?
C5 C6 C7 112.9(2) . . ?
C5 C6 H6A 109.0 . . ?
C7 C6 H6A 109.0 . . ?
C5 C6 H6B 109.0 . . ?
C7 C6 H6B 109.0 . . ?
H6A C6 H6B 107.8 . . ?
C6 C7 C2 110.8(2) . . ?
C6 C7 H7A 109.5 . . ?
C2 C7 H7A 109.5 . . ?
C6 C7 H7B 109.5 . . ?
C2 C7 H7B 109.5 . . ?
H7A C7 H7B 108.1 . . ?
C9 C8 C10 60.29(15) . . ?
C9 C8 C1 121.50(19) . . ?
C10 C8 C1 123.1(2) . . ?
C9 C8 H8 113.9 . . ?
C10 C8 H8 113.9 . . ?
C1 C8 H8 113.9 . . ?
C8 C9 C10 60.23(15) . . ?
C8 C9 C11 123.3(2) . . ?
C10 C9 C11 123.7(2) . . ?
C8 C9 H9 113.2 . . ?
C10 C9 H9 113.2 . . ?
C11 C9 H9 113.2 . . ?
C8 C10 C9 59.47(15) . . ?
C8 C10 H10A 117.8 . . ?
C9 C10 H10A 117.8 . . ?
C8 C10 H10B 117.8 . . ?
C9 C10 H10B 117.8 . . ?
H10A C10 H10B 115.0 . . ?
O2 C11 C13 109.19(18) . . ?
O2 C11 C9 107.65(18) . . ?
C13 C11 C9 109.78(19) . . ?
O2 C11 C12 105.63(18) . . ?
C13 C11 C12 110.55(19) . . ?
C9 C11 C12 113.85(19) . . ?
C11 C12 H12A 109.5 . . ?
C11 C12 H12B 109.5 . . ?
H12A C12 H12B 109.5 . . ?
C11 C12 H12C 109.5 . . ?
H12A C12 H12C 109.5 . . ?
H12B C12 H12C 109.5 . . ?
C11 C13 H13A 109.5 . . ?
C11 C13 H13B 109.5 . . ?
H13A C13 H13B 109.5 . . ?
C11 C13 H13C 109.5 . . ?
H13A C13 H13C 109.5 . . ?
H13B C13 H13C 109.5 . . ?
C1 C14 H14A 109.5 . . ?
C1 C14 H14B 109.5 . . ?
H14A C14 H14B 109.5 . . ?
C1 C14 H14C 109.5 . . ?
H14A C14 H14C 109.5 . . ?
H14B C14 H14C 109.5 . . ?
C5 C15 H15A 109.5 . . ?
C5 C15 H15B 109.5 . . ?
H15A C15 H15B 109.5 . . ?
C5 C15 H15C 109.5 . . ?
H15A C15 H15C 109.5 . . ?
H15B C15 H15C 109.5 . . ?
C1 O1 H1O 109(2) . . ?
C11 O2 H2O 103.8(18) . . ?
 
_refine_diff_density_max    0.198
_refine_diff_density_min   -0.187
_refine_diff_density_rms    0.033

_shelx_res_file
;

    P21_a.res created by SHELXL-2014/7


TITL P21_a.res in P2(1)
CELL  0.71073   7.8728   6.9222  13.1511   90.000   96.888   90.000
ZERR    2.000   0.0009   0.0008   0.0015    0.000    0.002    0.000
LATT -1
SYMM -X, 1/2+Y, -Z
SFAC C  H  O
UNIT 30  52  4
REM Old TITL P21 in P2(1)
REM SHELXT solution in P2(1)
REM R1 0.100,  Rweak 0.028,  Alpha 0.005,  Orientation as input
REM Flack x= -1.209 ( 0.645 ) from Parsons' quotients
REM Formula found by SHELXT:  C15 O2
L.S. 20
simu 0.001
SHEL 20 0.84
ACTA 50
BOND $H
FMAP 2
PLAN 20
SIZE 0.075 0.078 0.188
TEMP -183.2
WGHT    0.034200    0.182500
FVAR       1.34147
C1    1    0.579753    0.518659    0.193769    11.00000    0.02055    0.01609 =
         0.01494    0.00279    0.00370    0.00047
C2    1    0.622228    0.661771    0.283934    11.00000    0.02067    0.01959 =
         0.01639    0.00216    0.00279   -0.00175
AFIX  13
H2    2    0.515139    0.735917    0.290671    11.00000   -1.20000
AFIX   0
C3    1    0.760165    0.810568    0.265773    11.00000    0.02396    0.02140 =
         0.01944    0.00225    0.00213   -0.00270
AFIX  23
H3A   2    0.861824    0.742221    0.246196    11.00000   -1.20000
H3B   2    0.715951    0.895880    0.208193    11.00000   -1.20000
AFIX   0
C4    1    0.812368    0.931681    0.359102    11.00000    0.02265    0.02384 =
         0.02143    0.00153    0.00122   -0.00361
AFIX  43
H4    2    0.877377    1.044857    0.350475    11.00000   -1.20000
AFIX   0
C5    1    0.774585    0.892709    0.453012    11.00000    0.02263    0.02975 =
         0.02177   -0.00074    0.00063   -0.00529
C6    1    0.681758    0.709720    0.474752    11.00000    0.02664    0.03220 =
         0.01995    0.00121    0.00093   -0.00867
AFIX  23
H6A   2    0.563634    0.742491    0.487266    11.00000   -1.20000
H6B   2    0.739880    0.649787    0.537904    11.00000   -1.20000
AFIX   0
C7    1    0.674442    0.563420    0.387293    11.00000    0.02411    0.02648 =
         0.01830    0.00358    0.00089   -0.00646
AFIX  23
H7A   2    0.590839    0.460810    0.398055    11.00000   -1.20000
H7B   2    0.788053    0.502243    0.387034    11.00000   -1.20000
AFIX   0
C8    1    0.419869    0.403336    0.208492    11.00000    0.02043    0.01501 =
         0.01612    0.00068    0.00347    0.00118
AFIX  13
H8    2    0.429732    0.327109    0.273526    11.00000   -1.20000
AFIX   0
C9    1    0.315399    0.306542    0.120423    11.00000    0.02089    0.01480 =
         0.01671   -0.00081    0.00433    0.00242
AFIX  13
H9    2    0.351377    0.341862    0.052443    11.00000   -1.20000
AFIX   0
C10   1    0.241221    0.474106    0.173708    11.00000    0.02002    0.01598 =
         0.01923   -0.00180    0.00367    0.00128
AFIX  23
H10A  2    0.228686    0.599087    0.136978    11.00000   -1.20000
H10B  2    0.150994    0.445976    0.217946    11.00000   -1.20000
AFIX   0
C11   1    0.250436    0.099875    0.124581    11.00000    0.02290    0.01460 =
         0.01855   -0.00172    0.00719    0.00284
C12   1    0.227740    0.031091    0.232183    11.00000    0.02957    0.01742 =
         0.02254   -0.00190    0.01095   -0.00311
AFIX 137
H12A  2    0.179272   -0.099477    0.228715    11.00000   -1.50000
H12B  2    0.150267    0.118935    0.262608    11.00000   -1.50000
H12C  2    0.339083    0.029577    0.274432    11.00000   -1.50000
AFIX   0
C13   1    0.084063    0.078273    0.053574    11.00000    0.02529    0.01760 =
         0.02626   -0.00302    0.00418    0.00201
AFIX 137
H13A  2    0.101569    0.120462   -0.015537    11.00000   -1.50000
H13B  2   -0.004838    0.157874    0.078907    11.00000   -1.50000
H13C  2    0.048336   -0.057427    0.051634    11.00000   -1.50000
AFIX   0
C14   1    0.724700    0.377664    0.181291    11.00000    0.02258    0.01842 =
         0.02179    0.00317    0.00579    0.00237
AFIX 137
H14A  2    0.694943    0.299887    0.119453    11.00000   -1.50000
H14B  2    0.742247    0.292561    0.241182    11.00000   -1.50000
H14C  2    0.830036    0.449956    0.175220    11.00000   -1.50000
AFIX   0
C15   1    0.823500    1.024472    0.542630    11.00000    0.02708    0.03982 =
         0.02549   -0.00709    0.00163   -0.00659
AFIX 137
H15A  2    0.882205    1.138461    0.519718    11.00000   -1.50000
H15B  2    0.899920    0.955836    0.594861    11.00000   -1.50000
H15C  2    0.720259    1.065008    0.571727    11.00000   -1.50000
AFIX   0
O1    3    0.553175    0.624706    0.098970    11.00000    0.02450    0.01421 =
         0.01469    0.00233    0.00598    0.00387
O2    3    0.378955   -0.026040    0.089755    11.00000    0.02685    0.01493 =
         0.01717    0.00256    0.00859    0.00460
H1O   2    0.493976    0.710715    0.105741    11.00000   -1.20000
H2O   2    0.402788    0.026949    0.035873    11.00000   -1.20000
HKLF 4

REM  P21_a.res in P2(1)
REM R1 =  0.0349 for    2196 Fo > 4sig(Fo)  and  0.0375 for all    2329 data
REM    164 parameters refined using    109 restraints

END

WGHT      0.0327      0.1882

REM Highest difference peak  0.198,  deepest hole -0.187,  1-sigma level  0.033
Q1    1   0.6343  0.7988  0.4639  11.00000  0.05    0.20
Q2    1   0.6083  0.5824  0.2368  11.00000  0.05    0.16
Q3    1   0.2775  0.2087  0.1320  11.00000  0.05    0.16
Q4    1   0.4947  0.4622  0.1991  11.00000  0.05    0.16
Q5    1   0.1756  0.0959  0.0922  11.00000  0.05    0.15
Q6    1   0.3297  0.4633  0.2164  11.00000  0.05    0.13
Q7    1   0.2288  0.5436  0.1381  11.00000  0.05    0.12
Q8    1   0.0516 -0.2161  0.0028  11.00000  0.05    0.12
Q9    1   0.8375  0.3993  0.2242  11.00000  0.05    0.12
Q10   1   0.4049  0.6031  0.0778  11.00000  0.05    0.12
Q11   1   0.9793  0.6984  0.3510  11.00000  0.05    0.12
Q12   1   0.2545  0.0804  0.1737  11.00000  0.05    0.11
Q13   1   0.7247  0.6331  0.4553  11.00000  0.05    0.11
Q14   1   0.4861  0.8176  0.4599  11.00000  0.05    0.11
Q15   1   0.6645  0.7773  0.2620  11.00000  0.05    0.11
Q16   1   0.8349  0.8203  0.2989  11.00000  0.05    0.11
Q17   1   0.7354  0.9520  0.3993  11.00000  0.05    0.11
Q18   1   0.8190  0.5667  0.4159  11.00000  0.05    0.10
Q19   1   0.6710  0.4632  0.2015  11.00000  0.05    0.10
Q20   1   0.5883  0.8960  0.1862  11.00000  0.05    0.10
;
_shelx_res_checksum   85821

_shelx_hkl_file
;
   1   0   0 3291.27   53.19
  -1   0   0 3150.78   52.19
  -2   0   0 6095.99  100.89
   2   0   0 6217.18  100.89
   4   0   0   33.40    2.50
   5   0   0  274.77    8.10
   6   0   0  354.26   10.50
   7   0   0   12.90    2.70
   8   0   0   12.30    3.10
   9   0   0   25.90    4.50
  10   0   0    1.40    2.40
   0   1   0   -5.30    0.60
   1  -1   0 6121.19   97.49
  -1  -1   0 6032.80   96.79
  -1  -1   0 6137.19   94.19
   1   1   0 6203.98   98.69
  -2  -1   0 3395.46   54.19
   2  -1   0 3499.55   54.49
   2   1   0 3445.36   54.49
  -3  -1   0 1114.39   19.80
   3  -1   0 1101.49   20.00
   3   1   0 1113.49   20.00
  -4  -1   0  242.48    6.90
   4  -1   0  239.98    7.00
   4   1   0  244.78    7.10
   5  -1   0   88.09    4.50
  -5  -1   0   83.79    4.30
   5   1   0   93.49    4.60
   6  -1   0   12.60    2.50
   6   1   0   12.60    2.70
   7  -1   0   50.39    4.80
   7   1   0   58.49    5.50
   8  -1   0   64.79    5.30
   8   1   0   55.99    5.70
   9  -1   0    7.90    2.80
   9   1   0    8.10    3.00
  10  -1   0   60.29    6.90
  10   1   0   56.09    6.90
   0   2   0 4023.90   63.89
  -1  -2   0   38.80    2.10
   1  -2   0   40.00    2.30
   1   2   0   33.40    2.30
  -2  -2   0  963.50   15.00
   2  -2   0  947.51   17.50
  -2  -2   0  934.01   17.10
   2   2   0  933.41   17.70
  -3  -2   0  284.17    7.30
   3   2   0  274.27    7.70
  -4  -2   0  117.89    4.70
   4  -2   0  127.69    5.10
   4   2   0  130.89    5.40
  -5  -2   0  519.95   12.70
   5  -2   0  516.65   12.90
   5   2   0  529.35   13.30
   6  -2   0  125.19    6.10
  -6  -2   0  132.69    6.10
   6   2   0  125.99    6.30
   7  -2   0   12.80    2.70
   7   2   0   20.20    3.50
   8  -2   0    1.10    1.90
   8   2   0    4.30    2.50
   9  -2   0    7.10    2.80
   9   2   0    5.50    2.90
   0   3   0   -0.40    0.90
  -1  -3   0  583.44   12.00
   1   3   0  585.04   13.10
  -2  -3   0  207.18    4.70
  -2  -3   0  207.58    6.10
   2   3   0  206.68    6.80
  -3  -3   0   82.79    3.90
   3  -3   0   75.89    4.00
   3   3   0   69.99    4.10
  -4  -3   0  263.37    7.90
   4  -3   0  264.67    8.30
   4   3   0  250.27    8.40
  -5  -3   0  284.07    8.90
   5  -3   0  296.77    9.40
   5   3   0  283.27    9.70
   6  -3   0   62.49    4.70
  -6  -3   0   64.29    4.50
   6   3   0   64.49    5.00
   7  -3   0   23.30    3.60
  -7  -3   0   41.30    4.80
   7   3   0   32.80    4.50
   8  -3   0   37.00    4.80
   8   3   0   47.00    5.90
   9  -3   0   26.60    4.50
   9   3   0   41.10    6.10
   0   4   0   82.59    4.70
  -1  -4   0   48.80    3.00
   1   4   0   49.99    3.80
  -2  -4   0   91.99    4.30
   2  -4   0   98.89    4.80
   2   4   0   86.19    4.90
   3  -4   0   13.20    2.40
  -3  -4   0   17.20    2.40
   3   4   0   14.00    2.70
  -4  -4   0  139.89    6.00
   4  -4   0  147.79    6.40
   4   4   0  140.69    6.70
  -5  -4   0  180.98    7.30
   5  -4   0  174.38    7.50
   5   4   0  175.18    8.10
  -6  -4   0   62.19    4.80
   6  -4   0   74.39    5.40
   6   4   0   68.39    5.40
   7  -4   0   20.90    4.00
  -7  -4   0   20.40    3.50
   7   4   0   25.40    4.30
  -8  -4   0   20.10    4.10
   8  -4   0   15.00    3.50
   8   4   0   20.40    4.10
   9  -4   0   32.90    5.20
   9   4   0   34.30    5.70
   0   5   0    0.50    1.50
  -1  -5   0   60.79    3.70
   1   5   0   59.39    4.60
  -2  -5   0  215.58    7.50
   2  -5   0  243.48    8.60
   2   5   0  245.18    9.20
  -3  -5   0  278.87    8.90
   3  -5   0  277.47    9.50
   3   5   0  272.77   10.10
   4  -5   0  138.49    6.90
  -4  -5   0  135.29    6.40
   4   5   0  147.89    7.50
   5  -5   0   78.39    5.60
  -5  -5   0   77.99    5.10
   5   5   0   76.79    5.80
   6  -5   0   97.59    6.60
  -6  -5   0  115.89    6.40
   6   5   0  100.69    6.90
  -7  -5   0    1.50    2.10
   7  -5   0    6.30    2.70
   7   5   0    3.70    2.50
   8  -5   0   31.10    5.10
  -8  -5   0   25.10    4.60
   8   5   0   22.20    4.90
   0   6   0   20.30    3.50
  -1  -6   0   81.39    4.70
   1  -6   0   76.49    5.20
   1   6   0   80.69    5.90
  -2  -6   0   13.20    2.50
   2  -6   0   10.20    2.50
   2   6   0   15.30    3.30
  -3  -6   0   31.50    3.70
   3  -6   0   27.70    3.90
   3   6   0   37.20    4.80
   4  -6   0   13.50    3.20
  -4  -6   0   12.50    2.80
   4   6   0   11.10    3.10
   5  -6   0   31.80    4.40
  -5  -6   0   28.90    4.00
   5   6   0   29.50    4.80
  -6  -6   0    2.30    1.90
   6  -6   0    3.00    2.40
   6   6   0   -1.30    2.30
  -7  -6   0   12.00    3.10
   7  -6   0   10.50    3.70
   0   7   0    1.40    1.90
  -1  -7   0   54.49    5.10
   1  -7   0   55.29    5.80
   1   7   0   57.09    6.20
  -2  -7   0   64.29    4.80
   2  -7   0   78.99    5.90
   2   7   0   77.99    7.40
  -3  -7   0  131.89    6.90
   3  -7   0  132.69    7.60
   3   7   0  143.19    8.50
   4  -7   0  159.68    8.60
  -4  -7   0  158.58    7.80
   5  -7   0    9.60    3.30
  -5  -7   0   10.30    2.70
   6  -7   0   -2.20    2.20
  -6  -7   0    3.60    2.40
   1  -8   0   47.50    5.50
   2  -8   0   40.20    5.40
   3  -8   0   38.00    5.30
   4  -8   0   15.80    4.00
  10   0  -1    0.00    2.40
   9   0  -1    0.20    2.20
   8   0  -1    3.30    2.50
   7   0  -1    2.50    1.80
   6   0  -1  237.28    8.40
   5   0  -1    7.80    1.90
   4   0  -1    9.40    1.70
   3   0  -1   75.09    3.20
   2   0  -1 2506.45   40.00
   1   0  -1  948.71   15.20
   1   0  -1  912.91   14.90
  -1   0  -1  345.27    6.20
   1   0   1  349.47    6.30
  -1   0  -1  345.07    6.30
  -2   0  -1  427.76    8.30
  -2   0  -1  426.06    8.30
   2   0   1  422.56    8.30
  -3   0  -1  293.37    6.90
   3   0   1  288.57    6.90
   4   0   1   27.60    2.70
   5   0   1   22.50    2.80
   6   0   1  541.55   13.60
   7   0   1  118.29    6.30
   8   0   1   55.19    5.50
   9   0   1   10.90    3.40
  10   0   1   43.60    5.90
  10  -1  -1   47.80    6.10
  10   1  -1   45.90    6.20
   9  -1  -1    2.60    2.40
   9   1  -1   -3.30    1.80
   8  -1  -1   47.10    5.30
   8   1  -1   38.80    5.10
   7  -1  -1  121.89    6.30
   7   1  -1  121.79    6.70
   6  -1  -1   20.30    2.90
   6   1  -1   24.00    3.40
   5  -1  -1  282.77    8.40
   5   1  -1  264.77    8.40
   4  -1  -1  716.23   14.80
  -4  -1   1  716.43   14.60
   4   1  -1  710.53   15.10
   3  -1  -1  625.54   12.40
  -3  -1   1  615.44   12.20
   3   1  -1  624.94   12.80
  -2  -1   1 1340.27   22.60
   2  -1  -1 1341.77   22.80
   2   1  -1 1403.56   23.50
  -1  -1   1  398.46    7.30
   1  -1  -1  403.76    7.50
   1   1  -1  417.26    8.20
   1   1  -1  404.26    6.80
   0  -1  -1  725.23   12.50
   0   1   1  724.73   12.30
   0   1  -1  762.62   13.30
   0   1  -1  762.92   12.60
  -1  -1  -1 6488.15  102.99
   1  -1   1 6634.04  106.29
  -1  -1  -1 6644.73  104.49
   1   1   1 6471.95  104.29
   2  -1   1    1.80    0.90
  -2  -1  -1    1.90    0.90
  -2  -1  -1    1.50    0.50
   2   1   1    0.30    0.70
   3  -1   1  587.94   12.00
  -3  -1  -1  576.34   11.80
  -3  -1  -1  576.04   10.40
   3   1   1  578.84   11.70
   4  -1   1  179.98    5.90
  -4  -1  -1  171.98    5.70
   4   1   1  164.28    5.60
  -5  -1  -1  103.69    4.80
   5  -1   1  104.79    4.90
   5   1   1  111.39    5.00
   6  -1   1  163.68    6.70
  -6  -1  -1  156.58    6.50
   6   1   1  157.08    6.70
   7  -1   1  295.37   10.20
   7   1   1  290.17   10.10
   8  -1   1   25.20    3.90
   8   1   1   32.70    4.50
   9  -1   1    5.00    2.60
   9   1   1    7.50    3.10
  10  -1   1   34.20    5.50
  10   1   1   36.00    5.80
   9  -2  -1  129.19    8.00
   9   2  -1  121.99    8.20
   8  -2  -1    8.30    2.70
   8   2  -1   10.00    3.20
   7  -2  -1  286.97   10.30
   7   2  -1  292.27   10.80
  -6  -2   1  120.39    5.80
   6  -2  -1  118.09    5.90
   6   2  -1  121.59    6.40
  -5  -2   1  355.26    9.70
   5  -2  -1  337.67    9.70
   5   2  -1  332.87   10.20
   4  -2  -1  385.96    9.80
  -4  -2   1  390.36    9.60
   4   2  -1  377.96   10.30
  -3  -2   1 4764.12   75.59
   3  -2  -1 4802.92   75.99
   3   2  -1 4771.32   76.99
  -2  -2   1 2725.93   44.70
   2  -2  -1 2810.22   45.20
   2   2  -1 2833.82   46.30
   1  -2  -1  710.73   13.30
  -1  -2   1  726.13   12.90
   1   2  -1  729.13   14.40
   0   2  -1  257.87    6.90
   0   2   1  252.47    6.10
  -1  -2  -1 1776.12   28.10
   1   2   1 1718.53   29.10
  -2  -2  -1  548.25   11.40
  -2  -2  -1  572.34    9.60
   2  -2   1  551.54   11.70
   2   2   1  535.65   11.30
   3  -2   1  773.52   15.80
  -3  -2  -1  755.82   15.40
  -3  -2  -1  786.02   12.90
   3   2   1  785.52   15.50
   4  -2   1   41.60    3.00
  -4  -2  -1   47.60    3.20
   4   2   1   43.60    3.10
   5  -2   1   32.70    3.40
  -5  -2  -1   35.60    3.50
   5   2   1   39.50    3.90
   6  -2   1  638.84   15.60
  -6  -2  -1  618.14   15.30
   6   2   1  617.84   15.60
   7  -2   1   98.59    5.90
  -7  -2  -1   92.09    5.60
   7   2   1   96.19    6.00
   8  -2   1  115.69    7.10
   8   2   1  104.69    6.90
   9  -2   1   67.49    6.70
   9   2   1   83.09    6.80
   9  -3  -1    0.90    2.60
   9   3  -1    1.40    2.40
   8  -3  -1   57.69    5.80
   8   3  -1   81.69    6.50
   7  -3  -1   36.80    4.60
  -7  -3   1   29.10    3.90
   7   3  -1   29.90    4.50
  -6  -3   1   31.20    3.70
   6  -3  -1   33.30    4.00
   6   3  -1   31.60    4.30
   5  -3  -1  344.37   10.10
  -5  -3   1  334.77    9.80
   5   3  -1  319.37   10.50
   4  -3  -1  371.16    9.90
  -4  -3   1  356.06    9.40
   4   3  -1  332.97   10.30
   3  -3  -1  315.27    8.50
  -3  -3   1  295.07    7.90
   3   3  -1  288.07    9.00
   2  -3  -1  321.57    8.10
  -2  -3   1  310.17    7.60
   2   3  -1  302.67    8.90
  -1  -3   1  901.11   16.40
   1  -3  -1  897.71   17.00
   1   3  -1  884.51   18.40
   0   3   1  281.17    7.60
   0   3  -1  263.87    8.00
  -1   3  -1   61.89    3.80
   1   3   1   64.79    3.40
  -2  -3  -1   34.40    2.60
  -2  -3  -1   35.10    1.80
   2  -3   1   32.90    2.70
   2   3   1   36.20    2.80
  -3  -3  -1  492.15    8.60
   3  -3   1  474.15   11.80
  -3  -3  -1  484.25   11.50
   3   3   1  471.55   11.70
  -4  -3  -1  114.09    5.10
   4  -3   1  100.69    5.10
   4   3   1   99.49    5.00
  -5  -3  -1  306.67    9.50
   5  -3   1  286.97    9.40
   5   3   1  291.87    9.60
  -6  -3  -1  466.15   13.10
   6  -3   1  479.35   13.50
   6   3   1  462.25   13.50
   7  -3   1    1.80    1.80
  -7  -3  -1    4.50    2.10
   7   3   1    0.70    1.90
  -8  -3  -1   59.09    6.10
   8  -3   1   57.69    6.20
   8   3   1   54.29    6.20
   9  -3   1   53.39    6.10
   9   3   1   67.19    7.50
   9  -4  -1   28.40    5.00
   9   4  -1   30.40    5.30
  -8  -4   1   47.00    5.50
   8  -4  -1   33.60    4.80
   8   4  -1   35.50    5.40
   7  -4  -1   56.69    5.50
  -7  -4   1   58.99    5.40
   7   4  -1   53.39    6.00
   6  -4  -1    2.00    1.90
  -6  -4   1    9.10    2.30
   6   4  -1    3.10    2.20
   5  -4  -1  170.28    7.30
  -5  -4   1  198.08    7.30
   5   4  -1  180.58    8.30
  -4  -4   1   23.60    2.90
   4  -4  -1   18.50    2.80
   4   4  -1   27.40    3.80
  -3  -4   1   21.90    2.50
   3  -4  -1   28.80    3.20
   3   4  -1   23.40    3.30
  -2  -4   1   82.99    3.90
   2  -4  -1   84.69    4.30
   2   4  -1   69.49    4.50
  -1  -4   1  228.68    6.60
   1  -4  -1  232.08    7.20
   1   4  -1  236.58    8.40
   0   4  -1  164.88    6.90
   0   4   1  165.58    6.40
  -1   4  -1  173.28    7.10
   1   4   1  176.08    6.70
  -2  -4  -1  113.59    3.90
  -2  -4  -1  123.49    5.20
   2  -4   1  116.69    5.40
   2   4   1  125.49    5.60
   3  -4   1  197.48    7.40
  -3  -4  -1  193.18    7.00
   3   4   1  204.88    7.60
  -4  -4  -1   28.30    3.40
   4  -4   1   27.10    3.50
   4   4   1   24.00    3.30
  -5  -4  -1   41.70    4.20
   5  -4   1   33.90    3.90
   5   4   1   40.10    4.60
  -6  -4  -1   45.80    4.80
   6  -4   1   34.80    4.30
   6   4   1   42.40    4.90
  -7  -4  -1   46.90    5.10
   7  -4   1   31.00    4.40
   7   4   1   52.39    5.80
   8  -4   1   74.09    7.10
  -8  -4  -1   73.09    6.70
   8   4   1   90.39    7.00
   9  -4   1   44.50    9.00
  -9  -4  -1   53.79    8.20
   8  -5  -1   38.50    5.30
  -8  -5   1   44.60    5.70
   8   5  -1   32.10    5.50
  -7  -5   1    8.90    2.70
   7  -5  -1    8.20    3.00
   7   5  -1    5.30    2.90
  -6  -5   1  138.99    7.00
   6  -5  -1  132.29    7.30
   6   5  -1  137.99    8.20
  -5  -5   1  124.39    6.30
   5  -5  -1  130.59    6.80
   5   5  -1  129.79    7.60
   4  -5  -1   54.39    4.40
  -4  -5   1   47.80    4.40
   4   5  -1   50.09    5.40
  -3  -5   1   61.09    3.90
   3  -5  -1   69.59    4.60
   3   5  -1   66.99    5.20
   2  -5  -1  181.18    7.10
  -2  -5   1  182.88    6.50
   2   5  -1  194.48    8.40
   1  -5  -1   62.49    4.10
  -1  -5   1   67.49    3.80
   1   5  -1   56.59    5.30
   0   5  -1    7.50    2.30
   0   5   1   11.70    2.50
   1   5   1  354.36   11.00
  -1   5  -1  359.56   11.70
  -2  -5  -1   94.89    5.00
  -2  -5  -1   91.29    3.90
   2  -5   1   94.89    5.40
   2   5   1   90.79    5.50
   3  -5   1  159.78    7.30
  -3  -5  -1  148.29    6.60
   3   5   1  159.58    7.30
   4  -5   1   36.40    4.40
  -4  -5  -1   30.40    3.80
   4   5   1   34.20    4.30
  -5  -5  -1  109.99    6.10
   5  -5   1  104.09    6.50
   5   5   1  107.49    6.70
   6  -5   1   32.80    4.60
  -6  -5  -1   37.00    4.60
   6   5   1   32.50    4.70
  -7  -5  -1   81.39    6.20
   7  -5   1   92.19    6.90
   8  -5   1   96.99    7.30
  -8  -5  -1  108.19    7.50
   7  -6  -1   51.79    6.20
  -7  -6   1   63.29    6.40
   7   6  -1   52.49    6.90
  -6  -6   1   20.70    3.70
   6  -6  -1   21.90    4.10
   6   6  -1   18.60    4.40
  -5  -6   1    4.10    2.10
   5  -6  -1    6.20    2.70
   5   6  -1    9.50    3.20
   4  -6  -1   86.79    5.90
  -4  -6   1   96.69    5.50
   4   6  -1   90.19    6.70
   3  -6  -1    9.90    2.60
  -3  -6   1   12.30    2.50
   3   6  -1   17.80    3.80
  -2  -6   1  114.69    5.50
   2  -6  -1  121.29    6.30
   2   6  -1  101.99    6.80
   1  -6  -1   50.59    4.20
  -1  -6   1   50.09    3.70
   1   6  -1   58.89    6.00
   0   6  -1  320.97   11.90
   0   6   1  319.27   11.10
  -1  -6  -1  166.48    6.40
  -1  -6  -1  172.38    7.10
   1   6   1  183.48    8.20
  -2  -6  -1   70.99    4.80
   2  -6   1   67.19    5.10
   2   6   1   70.19    5.30
  -3  -6  -1  200.98    8.10
   3  -6   1  193.58    8.70
   3   6   1  187.18    8.80
  -4  -6  -1  110.19    6.30
   4  -6   1  104.99    6.80
   4   6   1  121.69    8.10
   5  -6   1   79.09    6.30
  -5  -6  -1   93.59    6.10
   6  -6   1   57.79    6.30
  -6  -6  -1   49.70    5.50
  -7  -6  -1   46.50    5.60
   7  -6   1   57.19    6.50
   6  -7  -1  115.29    7.80
  -6  -7   1  109.79    7.00
  -5  -7   1   14.30    3.10
   5  -7  -1   13.60    3.50
   5   7  -1   18.60    4.30
  -4  -7   1   39.50    4.60
   4  -7  -1   36.40    4.90
   4   7  -1   30.90    5.20
  -3  -7   1   15.00    3.60
   3  -7  -1   13.40    3.30
   3   7  -1   16.90    4.20
   2  -7  -1  189.48    8.70
   2   7  -1  195.58   10.00
   1  -7  -1   44.50    4.80
   1   7  -1   39.60    5.40
   0   7  -1  104.29    7.20
   0   7   1  111.49    7.10
  -1  -7  -1   47.20    4.80
   1  -7   1   40.10    4.90
   1   7   1   43.30    5.60
  -2  -7  -1   81.19    5.50
   2  -7   1   86.99    6.30
  -3  -7  -1  180.28    8.20
   3  -7   1  180.68    9.10
  -4  -7  -1   27.50    4.10
   4  -7   1   28.20    4.70
  -5  -7  -1   67.79    6.20
   5  -7   1   58.39    6.40
   6  -7   1   37.80    5.30
  -6  -7  -1   53.49    6.10
   4  -8  -1   -2.40    2.10
   3  -8  -1   21.40    4.30
   2  -8  -1   54.59    6.70
   2   8  -1   45.80    6.20
   1   8  -1   69.59    7.50
   0   8  -1   91.19    7.40
   1  -8   1   67.39    6.70
   2  -8   1    7.20    3.20
   3  -8   1    9.10    3.40
  -3  -8  -1   12.70    3.10
  -4  -8  -1   12.00    3.10
   4  -8   1    9.00    3.40
  10   0  -2   21.10    4.50
   9   0  -2    0.50    2.20
   8   0  -2  274.47   10.70
   7   0  -2  165.08    7.70
   6   0  -2 1178.98   24.40
   5   0  -2  485.65   12.10
   4   0  -2    2.60    1.20
   3   0  -2  105.69    3.90
   2   0  -2   34.00    2.00
   2   0  -2   32.50    1.70
   1   0  -2 9999.00  156.88
   1   0  -2 9711.33  156.18
   0   0  -2  409.66    7.20
  -1   0  -2 2480.05   38.00
  -1   0  -2 2375.76   38.30
   1   0   2 2445.16   38.50
  -2   0  -2  842.22   14.60
  -2   0  -2  817.02   14.90
   2   0   2  844.92   14.70
  -3   0  -2  561.74   11.20
   3   0   2  561.24   11.20
  -3   0  -2  550.84   11.30
  -4   0  -2  535.25   11.60
   4   0   2  516.75   11.50
   5   0   2   20.40    2.60
   6   0   2   11.60    2.30
   7   0   2    0.10    1.50
   8   0   2    0.90    1.90
   9   0   2   -0.10    2.10
  10  -1  -2    7.90    3.30
  10   1  -2    2.60    2.80
   9  -1  -2   20.10    4.10
   9   1  -2   20.80    4.40
   8  -1  -2   71.39    5.70
   8   1  -2   83.39    6.30
   7  -1  -2  140.59    7.00
   7   1  -2  139.59    7.10
   6  -1  -2  197.28    7.40
   6   1  -2  188.58    7.70
   5  -1  -2   89.09    4.50
   5   1  -2   88.89    4.80
   4  -1  -2  822.62   16.50
   4   1  -2  840.02   13.90
   4   1  -2  804.02   17.00
   3  -1  -2  657.33   13.00
   3   1  -2  657.73   10.90
   3   1  -2  646.64   13.60
  -2  -1   2 1752.82   29.20
   2  -1  -2 1843.02   29.40
   2   1  -2 1839.92   30.50
   2   1  -2 1752.32   27.90
   1  -1  -2  483.85    9.40
  -1  -1   2  486.35    8.50
   1  -1  -2  494.25    8.60
   1   1  -2  497.45    9.90
   1   1  -2  478.65    8.50
   0  -1  -2 2322.27   36.50
   0  -1  -2 2297.27   36.90
   0   1  -2 2355.46   37.80
   0   1  -2 2360.26   37.00
  -1  -1  -2   21.80    1.30
  -1  -1  -2   22.00    1.70
   1  -1   2   21.90    1.70
  -1   1  -2   16.70    1.60
   1   1   2   23.60    1.10
   2  -1   2 1384.16   23.40
  -2  -1  -2 1379.56   23.20
  -2  -1  -2 1333.97   22.10
  -2   1  -2 1310.47   23.60
   2   1   2 1350.96   22.40
  -3  -1  -2 1715.53   28.00
  -3  -1  -2 1685.03   29.20
   3  -1   2 1694.53   29.30
   3   1   2 1727.43   28.80
  -4  -1  -2  356.66    8.90
   4  -1   2  345.87    9.00
  -4  -1  -2  343.57    7.90
   4   1   2  357.36    8.80
   5  -1   2   16.70    2.40
  -5  -1  -2   20.50    2.60
   5   1   2   22.70    2.80
  -6  -1  -2   41.90    3.90
   6  -1   2   42.40    4.10
   6   1   2   39.00    3.90
   7  -1   2  114.49    6.30
   7   1   2  111.59    6.20
   8  -1   2   22.90    3.80
   8   1   2   27.40    4.10
   9  -1   2   30.00    4.70
   9   1   2   35.40    5.10
   9  -2  -2   20.80    4.40
   9   2  -2   13.60    3.80
   8  -2  -2   23.80    4.00
   8   2  -2   14.10    3.40
   7  -2  -2  154.88    7.40
   7   2  -2  142.19    7.70
   6  -2  -2  186.58    7.40
   6   2  -2  177.28    7.90
   5  -2  -2  145.39    6.00
  -5  -2   2  162.98    6.10
   5   2  -2  167.28    7.00
   4  -2  -2 1082.09   20.70
  -4  -2   2 1077.49   20.40
   4   2  -2 1064.59   21.90
  -3  -2   2  415.46    9.20
   3  -2  -2  412.76    9.40
   3   2  -2  403.66   10.50
  -2  -2   2   61.09    2.50
   2  -2  -2   63.29    2.80
   2   2  -2   61.29    3.50
  -1  -2   2 1045.10   17.20
   1  -2  -2 1019.10   17.70
   1   2  -2 1035.60   19.60
   0  -2  -2  839.92   15.30
   0   2   2  844.62   14.90
   0   2  -2  861.91   16.80
  -1  -2  -2  132.19    3.70
  -1   2  -2  134.69    5.00
   1   2   2  137.19    3.90
   2  -2   2  103.89    4.20
  -2  -2  -2  100.19    3.00
  -2  -2  -2   98.79    4.00
   2   2   2  101.99    3.60
  -3  -2  -2  107.09    3.10
   3  -2   2  108.09    4.50
  -3  -2  -2   99.69    4.30
   3   2   2   99.69    4.00
  -4  -2  -2  302.27    6.50
  -4  -2  -2  285.07    8.30
   4  -2   2  299.87    8.60
   4   2   2  290.37    8.10
  -5  -2  -2   33.40    3.30
   5  -2   2   37.90    3.80
   5   2   2   35.00    3.50
  -6  -2  -2   54.29    4.70
   6  -2   2   51.89    4.10
   6   2   2   50.09    4.20
   7  -2   2  220.18    9.00
  -7  -2  -2  219.08    8.80
   7   2   2  235.78    9.20
   8  -2   2  127.49    7.30
   8   2   2  111.59    7.00
   9  -2   2   99.19    7.20
   9   2   2   87.79    6.90
   9  -3  -2   24.90    4.60
   9   3  -2   29.80    5.20
   8  -3  -2   54.99    5.90
   8   3  -2   54.39    6.30
   7  -3  -2   45.60    5.00
   7   3  -2   40.50    5.00
   6  -3  -2    2.30    1.70
  -6  -3   2    2.60    1.50
   6   3  -2   -0.50    1.60
  -5  -3   2   34.40    3.50
   5  -3  -2   38.60    3.80
   5   3  -2   34.40    4.20
   4  -3  -2  178.28    6.50
  -4  -3   2  175.98    6.10
   4   3  -2  193.48    7.50
   3  -3  -2    3.00    1.10
  -3  -3   2    2.30    1.00
   3   3  -2    2.50    1.40
  -2  -3   2 1672.23   28.40
   2  -3  -2 1680.73   29.10
   2   3  -2 1677.43   31.20
  -1  -3   2  524.95   10.20
   1  -3  -2  524.65   10.90
   1   3  -2  506.05   12.70
   0  -3  -2 1037.80   18.90
   0   3  -2 1014.20   20.90
   0   3   2 1040.60   19.20
  -1  -3  -2  519.65   10.50
   1   3   2  508.05   11.00
  -1   3  -2  489.45   12.40
  -2  -3  -2  148.49    4.10
   2  -3   2  143.89    5.60
  -2  -3  -2  140.79    5.40
   2   3   2  135.39    5.00
  -3  -3  -2  180.08    4.40
  -3  -3  -2  178.38    6.40
   3  -3   2  178.28    6.60
   3   3   2  187.78    6.20
   4  -3   2  254.97    8.50
  -4  -3  -2  261.87    8.40
   4   3   2  251.87    8.00
  -5  -3  -2  136.19    6.20
   5  -3   2  141.49    6.50
   5   3   2  142.99    6.40
  -6  -3  -2  113.39    6.00
   6  -3   2  106.89    6.10
   6   3   2  118.29    6.20
  -7  -3  -2   45.60    4.80
   7  -3   2   57.79    5.80
   7   3   2   60.99    5.90
  -8  -3  -2   31.80    4.70
   8  -3   2   31.10    4.80
   8   3   2   37.60    5.20
   9  -3   2   20.50    4.20
   9   3   2   28.90    5.30
   9  -4  -2   45.50    5.80
   9   4  -2   34.60    5.60
   8  -4  -2   40.20    5.20
   8   4  -2   29.20    5.00
   7  -4  -2   30.70    4.20
  -7  -4   2   45.40    4.80
   7   4  -2   46.90    6.00
   6  -4  -2   45.30    4.80
  -6  -4   2   56.99    4.30
   6   4  -2   39.20    5.10
  -5  -4   2   16.30    2.70
   5  -4  -2   17.80    2.90
   5   4  -2   20.40    3.60
  -4  -4   2  140.09    5.60
   4  -4  -2  134.29    5.90
   4   4  -2  131.99    6.80
   3  -4  -2  216.88    7.20
  -3  -4   2  206.78    6.60
   3   4  -2  205.68    8.40
   2  -4  -2  242.08    7.30
  -2  -4   2  249.08    6.80
   2   4  -2  234.38    8.70
  -1  -4   2    9.00    1.50
   1  -4  -2   10.50    1.80
   1   4  -2   11.60    2.40
   0   4   2    4.50    1.50
   0   4  -2    2.50    1.60
  -1  -4  -2   93.09    3.90
  -1   4  -2   84.99    5.10
   1   4   2   91.59    4.50
  -2  -4  -2  183.78    5.40
   2  -4   2  187.18    7.10
  -2  -4  -2  181.38    6.80
   2   4   2  198.78    6.80
  -3  -4  -2   35.60    3.70
   3  -4   2   28.20    3.40
   3   4   2   33.70    3.50
   4  -4   2  766.82   18.10
  -4  -4  -2  767.42   17.60
   4   4   2  740.63   17.40
   5  -4   2    8.10    2.40
  -5  -4  -2   10.10    2.50
   5   4   2   10.50    2.40
   6  -4   2  209.38    9.00
  -6  -4  -2  193.88    8.40
   6   4   2  202.08    8.80
  -7  -4  -2   14.80    3.30
   7  -4   2   13.30    3.20
   7   4   2   13.20    3.40
  -8  -4  -2    1.90    2.20
   8  -4   2    0.80    2.20
  -8  -5   2   36.00    5.10
   8  -5  -2   32.20    5.00
   8   5  -2   44.60    6.60
   7  -5  -2   16.20    3.70
  -7  -5   2   15.50    3.30
   7   5  -2    6.00    2.90
  -6  -5   2    5.00    2.10
   6  -5  -2    6.00    2.40
   6   5  -2    4.10    2.40
  -5  -5   2   97.89    5.40
   5  -5  -2   97.79    5.80
   5   5  -2   89.69    6.60
  -4  -5   2  118.29    5.50
   4  -5  -2  117.09    6.00
   4   5  -2  111.79    7.00
  -3  -5   2  317.97    9.20
   3  -5  -2  321.67   10.00
   3   5  -2  342.87   12.00
  -2  -5   2   39.90    2.90
   2  -5  -2   43.10    3.40
   2   5  -2   38.90    4.60
   1  -5  -2  239.38    7.70
  -1  -5   2  230.08    6.90
   1   5  -2  211.38    9.10
   0   5   2   59.69    4.10
   0   5  -2   58.19    5.60
  -1  -5  -2   29.30    3.00
   1   5   2   29.60    3.50
  -1   5  -2   29.00    4.10
  -2  -5  -2   64.89    4.30
  -2  -5  -2   60.59    3.40
   2  -5   2   62.89    4.70
   2   5   2   52.59    4.10
  -3  -5  -2  543.95   14.10
   3  -5   2  533.25   14.80
   3   5   2  541.75   14.40
   4  -5   2  185.48    8.30
  -4  -5  -2  181.98    7.80
   4   5   2  191.38    8.10
  -5  -5  -2  127.69    6.80
   5  -5   2  131.79    7.40
  -6  -5  -2   11.40    3.00
   6  -5   2    8.20    2.70
  -7  -5  -2    6.40    2.60
   7  -5   2    4.20    2.50
  -8  -5  -2   93.99    7.10
   8  -5   2   64.69    7.10
  -7  -6   2   13.70    3.20
   7  -6  -2   15.90    3.60
   7   6  -2    8.80    3.50
   6  -6  -2   49.50    5.70
  -6  -6   2   43.10    5.00
   6   6  -2   46.00    6.50
  -5  -6   2    8.30    2.30
   5  -6  -2    6.10    2.30
   5   6  -2   12.90    3.70
   4  -6  -2    2.90    1.90
  -4  -6   2    3.50    1.70
   4   6  -2    3.10    2.20
  -3  -6   2   51.79    3.80
   3  -6  -2   42.80    4.50
   3   6  -2   49.80    5.80
  -2  -6   2   33.30    3.50
   2  -6  -2   34.50    4.00
   2   6  -2   34.50    5.00
   1  -6  -2   47.60    4.50
   1   6  -2   46.10    5.30
   0  -6  -2   47.00    4.20
   0   6  -2   50.19    5.60
   0   6   2   67.49    4.90
  -1  -6  -2  258.37    8.40
   1   6   2  281.17   10.10
  -1   6  -2  263.97   10.90
  -2  -6  -2  148.79    7.10
   2  -6   2  159.48    7.80
   3  -6   2   69.29    5.60
  -3  -6  -2   74.49    5.20
   4  -6   2   66.09    6.40
  -4  -6  -2   64.79    5.90
   5  -6   2   15.00    3.40
  -5  -6  -2   21.70    3.70
   6  -6   2  101.99    7.30
  -6  -6  -2   95.09    6.70
  -7  -6  -2  164.48    9.00
   7  -6   2  183.38   10.10
   6  -7  -2  213.68   10.40
   6   7  -2  224.18   12.20
   5  -7  -2   36.70    4.90
   5   7  -2   30.60    5.50
   4  -7  -2    6.00    2.50
   4   7  -2   16.10    4.20
   3  -7  -2   45.60    5.00
   3   7  -2   46.50    6.30
   2  -7  -2   13.50    2.90
   2   7  -2    9.30    3.10
   1  -7  -2  288.87   11.50
   1   7  -2  332.47   13.30
   0  -7  -2   11.80    2.80
   0   7  -2   20.80    4.20
  -1  -7  -2  221.28    9.10
   1  -7   2  230.98   10.20
   2  -7   2    1.80    2.10
  -2  -7  -2   -0.80    1.50
  -3  -7  -2   35.70    4.50
   3  -7   2   30.60    4.50
   4  -7   2   60.49    6.70
  -4  -7  -2   68.79    6.30
  -5  -7  -2  112.69    7.20
   5  -7   2  105.19    7.90
   6  -7   2   17.20    4.20
  -6  -7  -2   24.00    4.40
   4   8  -2   27.10    5.30
   3   8  -2   37.80    6.10
   2   8  -2    4.00    2.90
   1  -8  -2   78.89    6.10
   1   8  -2   90.59    8.80
   0   8  -2  110.29    8.40
  -1  -8  -2  224.18    9.70
   1  -8   2  231.68   10.90
   2  -8   2   52.49    6.30
  -2  -8  -2   41.30    5.00
   3  -8   2   23.60    4.60
  -3  -8  -2   19.80    3.80
   4  -8   2   41.00    5.90
  -4  -8  -2   37.50    5.00
  10   0  -3   56.99    7.10
   9   0  -3   -2.70    1.90
   8   0  -3   45.60    5.20
   7   0  -3  662.23   17.10
   6   0  -3  480.25   13.00
   5   0  -3  122.99    5.50
   5   0  -3  116.89    4.20
   4   0  -3    5.70    1.20
   4   0  -3    4.20    1.40
   3   0  -3   22.00    2.30
   3   0  -3   21.80    1.70
   2   0  -3 1149.19   20.10
   2   0  -3 1158.98   19.50
   1   0  -3 2116.79   34.00
   1   0  -3 2134.89   33.90
   0   0  -3 4419.16   71.29
   0   0  -3 4558.94   72.29
  -1   0  -3  128.79    3.30
   1   0   3  122.19    3.20
  -1   0  -3  128.29    3.70
   2   0   3 1234.88   20.80
  -2   0  -3 1228.88   21.50
  -2   0  -3 1249.47   20.90
   3   0   3   27.10    2.00
  -3   0  -3   28.60    2.00
  -3   0  -3   24.90    2.30
  -4   0  -3 1378.46   25.10
   4   0   3 1378.76   24.70
  -4   0  -3 1352.46   24.60
  -5   0  -3   35.60    3.40
   5   0   3   37.70    3.50
   6   0   3   12.80    2.40
   7   0   3    5.10    2.10
   8   0   3   27.70    4.20
   9   0   3   42.50    5.50
  10  -1  -3   51.49    6.40
  10   1  -3   71.69    8.00
   9  -1  -3   95.19    7.20
   9   1  -3   87.89    7.20
   8  -1  -3  191.68    9.00
   8   1  -3  198.38    9.50
   7  -1  -3    9.10    2.60
   7   1  -3    4.80    2.10
   6  -1  -3  327.47   10.30
   6   1  -3  355.06   11.10
   5  -1  -3  224.28    7.40
   4  -1  -3  452.55   10.60
   4   1  -3  454.45   11.30
   4   1  -3  437.56    8.40
   3  -1  -3  141.39    4.60
   3  -1  -3  133.09    4.40
   3   1  -3  135.99    3.30
   3   1  -3  138.59    5.10
   2  -1  -3  686.93   13.40
   2  -1  -3  696.63   12.80
   2   1  -3  711.23   14.10
   2   1  -3  708.03   12.00
   1  -1  -3  468.25    8.40
   1  -1  -3  467.75    9.50
   1   1  -3  488.25    8.90
   1   1  -3  481.65   10.10
   0   1  -3  119.79    4.10
   0   1  -3  131.49    3.70
  -1  -1  -3   89.19    3.00
  -1   1  -3   96.59    2.20
   1   1   3   96.09    2.20
  -1   1  -3   95.69    3.50
   2  -1   3  292.47    7.20
  -2  -1  -3  294.27    6.60
  -2  -1  -3  300.37    7.20
  -2   1  -3  304.77    6.20
  -2   1  -3  290.57    7.60
   2   1   3  307.27    6.20
  -3  -1  -3  295.67    7.60
   3  -1   3  297.07    7.70
  -3  -1  -3  298.37    7.00
  -3   1  -3  294.77    8.10
   3   1   3  290.27    6.90
  -4  -1  -3   43.90    3.00
  -4  -1  -3   49.60    2.80
   4  -1   3   43.80    3.10
   4   1   3   53.29    3.10
  -5  -1  -3  108.79    5.00
   5  -1   3  108.79    5.10
  -5  -1  -3  107.49    4.40
   5   1   3  110.39    4.90
   6  -1   3   68.79    4.50
  -6  -1  -3   64.49    4.30
   6   1   3   61.79    4.20
  -7  -1  -3   57.99    5.30
   7  -1   3   51.49    5.00
   7   1   3   57.69    4.60
   8  -1   3   69.79    6.50
   8   1   3   70.89    5.50
   9  -1   3   26.20    4.40
   9   1   3   33.60    5.10
   9  -2  -3   10.80    3.30
   9   2  -3   11.50    3.80
   8  -2  -3   34.80    4.70
   8   2  -3   26.60    4.50
   7  -2  -3  100.89    6.00
   7   2  -3  107.99    6.80
   6  -2  -3  243.18    8.70
   6   2  -3  249.18    9.70
   5  -2  -3  430.76   11.30
   5   2  -3  448.06   12.60
   4  -2  -3  206.68    6.50
   4   2  -3  196.18    7.40
   3  -2  -3 1690.13   28.80
  -3  -2   3 1653.73   28.50
   3   2  -3 1657.33   26.40
   3   2  -3 1672.43   30.70
  -2  -2   3  214.38    5.20
   2  -2  -3  218.88    5.50
   2   2  -3  214.08    6.90
   2   2  -3  215.78    4.90
  -1  -2   3   65.19    2.00
   1  -2  -3   65.69    3.10
   1  -2  -3   63.99    2.30
   1   2  -3   63.69    2.70
   1   2  -3   62.79    3.60
   0  -2  -3  330.47    7.50
   0  -2  -3  313.77    6.00
   0   2  -3  332.67    7.70
   0   2  -3  319.27    8.60
  -1  -2  -3  284.57    6.70
  -1   2  -3  299.37    7.70
  -1   2  -3  309.07    8.30
   1   2   3  291.87    6.10
  -2  -2  -3  364.36    7.70
   2  -2   3  377.46    9.40
  -2  -2  -3  364.36    9.10
   2   2   3  380.56    7.90
   3  -2   3  188.88    6.40
  -3  -2  -3  192.78    5.00
  -3  -2  -3  190.88    6.30
   3   2   3  197.18    5.60
   4  -2   3   43.90    3.30
  -4  -2  -3   40.20    2.30
  -4  -2  -3   34.90    3.20
   4   2   3   38.80    2.80
   5  -2   3  102.19    5.30
  -5  -2  -3   93.39    5.00
   5   2   3  111.79    5.10
  -6  -2  -3  310.07   10.00
   6  -2   3  296.87   10.00
   6   2   3  301.37    9.70
   7  -2   3   68.29    5.20
  -7  -2  -3   63.09    4.90
   7   2   3   72.99    5.30
  -8  -2  -3  155.18    7.90
   8  -2   3  140.09    7.70
   8   2   3  127.99    7.40
   9  -2   3    9.20    3.00
   9   2   3    7.40    3.10
   9  -3  -3    3.50    2.70
   9   3  -3    6.30    2.90
   8  -3  -3   21.30    4.00
   8   3  -3   17.50    3.80
   7  -3  -3  122.79    6.80
   7   3  -3  117.59    7.50
   6  -3  -3   19.10    3.00
   6   3  -3   13.10    3.00
  -5  -3   3   87.99    4.60
   5  -3  -3   93.99    5.00
   5   3  -3   87.39    5.60
  -4  -3   3  316.47    8.60
   4  -3  -3  332.17    9.10
   4   3  -3  314.87   10.50
   3  -3  -3  503.45   11.50
  -3  -3   3  521.25   11.10
   3   3  -3  525.95   13.60
   2  -3  -3   37.60    2.40
  -2  -3   3   38.60    2.10
   2   3  -3   39.00    4.10
  -1  -3   3  719.93   12.90
   1  -3  -3  726.73   13.70
   1  -3  -3  728.63   15.00
   1   3  -3  732.33   16.70
   0  -3   3 1377.16   21.50
   0  -3  -3 1349.47   23.70
   0   3   3 1287.57   22.80
   0   3  -3 1246.68   25.60
  -1  -3  -3  621.34   12.30
   1   3   3  605.84   12.20
  -1   3  -3  596.64   14.50
  -2  -3  -3  356.76    7.90
  -2  -3  -3  349.96    9.50
   2   3   3  348.17    8.40
   3  -3   3  119.79    5.60
  -3  -3  -3  125.99    3.90
  -3  -3  -3  123.49    5.40
   3   3   3  141.89    5.10
  -4  -3  -3   92.59    4.90
   4  -3   3   91.99    5.10
   4   3   3   90.99    4.50
   5  -3   3  487.75   13.30
  -5  -3  -3  467.05   12.90
   5   3   3  482.55   12.60
  -6  -3  -3   76.59    5.10
   6  -3   3   78.59    5.40
   6   3   3   68.89    4.80
  -7  -3  -3   97.29    6.20
   7  -3   3   98.29    6.40
   7   3   3   89.09    6.00
  -8  -3  -3   24.70    3.80
   8  -3   3   16.70    3.60
   9  -3   3  126.69    8.20
  -9  -3  -3  130.59    8.20
   9  -4  -3   18.10    4.30
   9   4  -3   21.60    4.80
   8  -4  -3    8.80    3.00
   8   4  -3   11.50    3.80
   7  -4  -3   73.19    5.70
   7   4  -3   67.99    7.00
   6  -4  -3   93.59    5.60
  -6  -4   3   93.59    5.50
   6   4  -3   92.69    6.80
   5  -4  -3   20.90    3.20
  -5  -4   3   14.80    2.50
   5   4  -3   17.20    3.60
  -4  -4   3   52.19    3.40
   4  -4  -3   50.89    3.70
   4   4  -3   59.49    5.70
   3  -4  -3  320.47    8.90
  -3  -4   3  313.67    8.30
   3   4  -3  309.77   10.80
  -2  -4   3  287.57    7.20
   2  -4  -3  288.27    7.90
   2   4  -3  284.87   10.00
   1  -4  -3  110.49    4.30
   1  -4  -3  117.39    5.10
  -1  -4   3  112.49    3.80
   1   4  -3  104.39    5.90
   0  -4  -3    3.20    1.30
   0  -4   3    9.50    1.30
   0   4  -3    8.60    2.20
   0   4   3    8.30    1.60
  -1  -4  -3  136.79    5.00
  -1   4  -3  144.39    6.80
   1   4   3  135.69    5.20
  -2  -4  -3  125.79    5.80
  -2  -4  -3  125.49    4.60
   2  -4   3  141.69    6.30
   2   4   3  130.49    5.30
   3  -4   3  417.46   12.10
  -3  -4  -3  400.96   11.40
   3   4   3  410.26   10.90
   4  -4   3  531.55   14.60
  -4  -4  -3  551.84   14.30
   4   4   3  554.24   13.80
  -5  -4  -3  267.87    9.70
   5  -4   3  269.77   10.00
   5   4   3  249.08   11.10
   6  -4   3   11.00    2.90
  -6  -4  -3    5.60    2.20
  -7  -4  -3    2.20    2.10
   7  -4   3    0.60    1.70
   8  -4   3   -0.30    2.10
  -8  -4  -3    0.30    1.80
   8  -5  -3   13.20    3.60
   8   5  -3   11.80    4.00
  -7  -5   3    3.50    2.10
   7  -5  -3    3.30    2.40
   7   5  -3    3.50    2.60
  -6  -5   3   58.09    5.40
   6  -5  -3   63.79    5.90
   6   5  -3   59.19    6.70
  -5  -5   3   11.90    2.40
   5  -5  -3   10.60    2.60
   5   5  -3    7.00    2.90
  -4  -5   3  138.79    5.90
   4  -5  -3  152.78    6.60
   4   5  -3  160.08    8.50
   3  -5  -3  291.67    9.10
  -3  -5   3  291.07    8.30
   3   5  -3  289.67   11.30
  -2  -5   3  246.18    7.10
   2  -5  -3  266.07    8.10
   2   5  -3  217.08    9.60
   1  -5  -3  228.48    7.50
  -1  -5   3  247.08    6.70
   1  -5  -3  246.68    8.30
   1   5  -3  233.38    9.80
   0  -5  -3  294.17    8.90
   0   5   3  292.77    9.00
   0   5  -3  292.37   11.00
  -1  -5  -3   50.19    3.50
  -1   5  -3   55.89    5.60
   1   5   3   53.39    3.80
  -2  -5  -3  831.72   16.70
   2  -5   3  833.22   19.70
  -2  -5  -3  805.72   18.90
   2   5   3  809.12   23.90
   3  -5   3  104.99    6.10
  -3  -5  -3  101.99    5.70
   4  -5   3   74.39    5.60
  -4  -5  -3   80.79    5.40
  -5  -5  -3  111.49    6.60
   5  -5   3  118.89    7.20
   6  -5   3   24.60    4.10
  -6  -5  -3   36.10    4.80
  -7  -5  -3  206.68    9.70
   7  -5   3  191.88    9.80
  -8  -5  -3   60.99    7.20
   8  -5   3   39.30    6.40
  -7  -6   3    6.00    2.60
   7  -6  -3    7.80    3.00
   7   6  -3   12.30    4.20
  -6  -6   3   44.60    4.90
   6  -6  -3   34.80    4.60
   6   6  -3   34.20    5.60
   5  -6  -3   10.20    2.80
  -5  -6   3   14.60    2.90
   5   6  -3   18.20    4.20
   4  -6  -3   57.09    4.60
  -4  -6   3   58.69    4.40
   4   6  -3   56.69    6.60
   3  -6  -3  155.68    7.00
   3   6  -3  157.18    8.90
   2  -6  -3  189.28    7.40
   2   6  -3  180.18    9.40
   1  -6  -3  166.08    6.80
   1  -6  -3  166.18    7.40
   1   6  -3  158.58    8.70
   0  -6  -3   41.80    4.20
   0   6  -3   52.29    6.00
  -1  -6  -3  312.27    9.40
  -1   6  -3  277.57   11.50
  -2  -6  -3  147.59    7.20
   2  -6   3  160.38    8.00
   3  -6   3   40.80    4.80
  -3  -6  -3   38.60    4.60
   4  -6   3   95.89    6.80
  -4  -6  -3   90.19    6.00
   5  -6   3  113.69    7.60
  -5  -6  -3  118.09    7.20
  -6  -6  -3  120.69    7.40
   6  -6   3   98.09    7.30
   7  -6   3   36.50    5.50
  -7  -6  -3   42.00    5.40
   6  -7  -3   37.00    5.10
   6   7  -3   24.10    5.50
   5  -7  -3   12.60    3.10
   5   7  -3    5.60    3.50
   4  -7  -3   28.80    4.40
   4   7  -3   23.20    5.00
   3   7  -3  222.88   11.50
   2  -7  -3  109.69    6.70
   2   7  -3  108.49    8.00
   1  -7  -3   63.19    5.70
   1   7  -3   69.79    7.50
   0  -7  -3   10.00    2.50
   0   7  -3    9.70    3.10
  -1  -7  -3   55.49    5.40
   2  -7   3   17.60    3.80
  -2  -7  -3   16.30    3.40
   3  -7   3   18.50    4.00
  -3  -7  -3   17.40    3.50
  -4  -7  -3   48.00    5.40
   4  -7   3   43.00    5.50
   5  -7   3   14.70    4.10
  -5  -7  -3   13.30    3.40
   4   8  -3   18.60    5.00
   3  -8  -3   14.40    3.70
   3   8  -3   16.60    4.60
   2  -8  -3   43.60    5.40
   2   8  -3   40.40    6.30
   1  -8  -3   18.30    3.80
   1   8  -3   17.70    4.30
   0   8  -3  103.09    8.30
  -1  -8  -3   46.70    5.60
   1  -8   3   55.99    6.50
   2  -8   3   19.90    4.30
  -2  -8  -3   20.10    3.90
  -3  -8  -3   21.30    3.90
   3  -8   3   22.90    4.80
   4  -8   3   13.40    4.00
  -4  -8  -3   12.10    3.50
  10   0  -4    0.50    2.60
   9   0  -4   32.60    5.50
   8   0  -4   28.70    4.40
   7   0  -4   59.99    5.80
   6   0  -4   79.89    5.10
   5   0  -4    7.90    1.50
   5   0  -4    5.60    1.90
   4   0  -4  606.44   12.10
   4   0  -4  605.44   13.70
   3   0  -4   11.00    1.40
   3   0  -4   10.90    1.80
   2   0  -4  338.97    7.90
   2   0  -4  345.17    7.40
   1   0  -4  506.45   10.00
   1   0  -4  538.85   10.20
   0   0  -4   77.29    2.70
   0   0  -4   75.39    2.90
  -1   0  -4  113.79    3.80
   1   0   4  107.49    3.10
  -1   0  -4  106.09    3.30
   2   0   4  232.18    5.60
  -2   0  -4  241.38    5.80
  -2   0  -4  233.48    6.30
   3   0   4  205.18    5.70
  -3   0  -4  201.28    5.70
  -3   0  -4  207.18    6.20
  -4   0  -4  591.84   13.40
   4   0   4  598.44   12.80
  -4   0  -4  598.74   12.80
   5   0   4   81.49    4.30
  -5   0  -4   86.39    4.30
  -5   0  -4   84.99    4.50
  -6   0  -4   28.90    3.40
   6   0   4   26.30    3.20
   7   0   4   -0.30    1.50
   8   0   4   25.20    4.10
   9   0   4   17.50    3.80
  10  -1  -4    5.00    3.30
  10   1  -4    7.40    3.30
   9  -1  -4    5.70    2.70
   9   1  -4    9.80    3.40
   8  -1  -4   21.20    3.90
   8   1  -4   14.80    3.60
   7  -1  -4   32.90    4.30
   7   1  -4   35.80    4.60
   6  -1  -4  130.49    5.50
   6  -1  -4  138.59    6.40
   6   1  -4  123.29    6.60
   5  -1  -4   99.09    5.00
   5  -1  -4  107.19    4.70
   5   1  -4   94.49    5.30
   4  -1  -4  271.17    7.50
   4  -1  -4  265.77    7.70
   4   1  -4  279.97    8.60
   4   1  -4  267.97    6.00
   3  -1  -4  175.48    5.50
   3  -1  -4  180.08    5.40
   3   1  -4  167.28    4.30
   3   1  -4  176.88    6.20
   2  -1  -4  871.71   16.50
   2  -1  -4  872.11   15.70
   2   1  -4  872.91   15.30
   2   1  -4  905.81   17.30
   1  -1  -4  140.49    4.50
   1  -1  -4  143.99    3.50
   1   1  -4  149.49    5.00
   1   1  -4  155.68    4.20
   0  -1  -4 3662.03   59.59
   0   1  -4 3804.32   60.49
   0   1  -4 3828.02   59.69
  -1  -1  -4  698.03   13.40
  -1   1  -4  742.33   11.90
   1   1   4  714.43   11.70
  -1   1  -4  715.73   14.10
  -1   1  -4  743.53   14.40
   2  -1   4  293.37    7.30
  -2  -1  -4  270.27    6.70
  -2  -1  -4  291.97    7.30
   2   1   4  282.67    5.90
  -2   1  -4  263.67    7.50
  -2   1  -4  279.67    5.90
   3  -1   4   27.80    2.60
  -3  -1  -4   35.30    3.00
  -3  -1  -4   33.20    2.30
  -3   1  -4   33.10    2.00
  -3   1  -4   38.90    3.40
   3   1   4   33.00    2.00
   4  -1   4   62.89    3.60
  -4  -1  -4   58.59    3.50
  -4  -1  -4   61.79    3.30
   4   1   4   60.19    3.20
  -4   1  -4   56.19    3.80
  -5  -1  -4   34.20    3.30
  -5  -1  -4   27.90    3.10
   5  -1   4   28.00    3.20
   5   1   4   31.00    3.10
  -6  -1  -4  137.19    6.20
   6  -1   4  132.79    6.20
   6   1   4  127.49    5.90
  -7  -1  -4  157.38    7.30
   7  -1   4  157.98    7.30
   7   1   4  152.38    7.10
   8  -1   4   25.00    4.00
   8   1   4   36.20    4.60
   9  -1   4   96.99    7.00
   9   1   4   82.99    6.60
   9  -2  -4  173.58    9.50
   9   2  -4  194.18   10.50
   8  -2  -4    8.20    2.90
   8   2  -4   10.60    3.40
   7  -2  -4   25.90    3.40
   7  -2  -4   26.40    3.90
   7   2  -4   20.90    3.90
   6  -2  -4  103.39    5.40
   6  -2  -4  107.59    5.60
   6   2  -4  104.39    6.40
   5  -2  -4   26.00    3.10
   5  -2  -4   25.00    3.00
   5   2  -4   32.00    4.10
   4  -2  -4  184.68    6.60
   4  -2  -4  187.78    6.20
   4   2  -4  184.28    7.30
   3  -2  -4  568.94   12.80
   3  -2  -4  581.64   11.90
   3   2  -4  560.64   10.40
   3   2  -4  553.84   13.70
   2  -2  -4  148.69    5.30
   2  -2  -4  160.88    4.40
   2   2  -4  163.58    4.40
   2   2  -4  159.48    6.10
   1  -2  -4   28.00    1.40
   1  -2  -4   31.10    2.80
   1   2  -4   29.00    2.00
   1   2  -4   33.10    3.20
   0  -2  -4  543.15   11.30
   0  -2  -4  532.65    8.80
   0   2  -4  556.14   11.60
   0   2  -4  542.75   12.70
  -1  -2  -4  773.72   14.80
   1   2   4  770.22   13.00
  -1   2  -4  791.82   16.50
  -1   2  -4  790.12   15.90
  -2  -2  -4  850.01   15.60
   2  -2   4  835.62   17.10
  -2  -2  -4  834.42   17.00
  -2   2  -4  855.51   17.60
   2   2   4  838.42   14.80
   3  -2   4  680.83   15.00
  -3  -2  -4  684.93   13.40
  -3  -2  -4  686.03   15.00
   3   2   4  692.03   13.40
   4  -2   4  269.87    8.50
  -4  -2  -4  262.67    7.10
  -4  -2  -4  277.07    8.50
   4   2   4  278.97    7.60
  -5  -2  -4    6.50    1.80
   5  -2   4    5.10    1.70
   5   2   4    5.30    1.60
   6  -2   4  109.59    6.00
  -6  -2  -4  120.09    6.10
   6   2   4  112.49    5.80
  -7  -2  -4  118.19    6.50
   7  -2   4  114.99    6.60
   7   2   4  114.39    6.30
  -8  -2  -4   26.70    4.00
   8  -2   4   28.90    4.40
   9  -2   4    2.00    2.60
   9  -3  -4   45.50    5.90
   9   3  -4   29.50    5.30
   8  -3  -4   28.90    4.20
   8  -3  -4   28.60    4.40
   8   3  -4   39.20    5.80
   7  -3  -4   11.40    3.00
   7   3  -4    4.90    2.70
   6  -3  -4   11.80    2.40
   6   3  -4   13.30    3.10
   5  -3  -4   49.20    3.70
   5   3  -4   62.39    5.90
  -4  -3   4   14.70    2.10
   4  -3  -4   10.80    2.00
   4   3  -4   12.50    2.60
   3  -3  -4  160.98    6.30
  -3  -3   4  158.58    5.00
   3  -3  -4  157.08    5.30
   3   3  -4  163.98    7.10
   3   3  -4  159.38    4.40
  -2  -3   4   57.49    2.50
   2  -3  -4   55.29    2.70
   2  -3  -4   58.69    3.70
   2   3  -4   56.29    4.20
   2   3  -4   57.09    2.80
  -1  -3   4 1026.70   17.00
   1  -3  -4 1031.60   20.00
   1  -3  -4 1011.80   17.80
   1   3  -4 1026.10   19.30
   1   3  -4 1021.30   21.80
   0  -3  -4 1209.58   20.30
   0  -3  -4 1235.58   22.50
   0   3  -4 1195.28   22.80
   0   3  -4 1239.98   24.90
  -1  -3  -4  256.07    7.00
  -1   3  -4  268.47    8.80
   1   3   4  249.18    6.00
   2  -3   4  210.08    7.40
  -2  -3  -4  210.48    6.00
  -2  -3  -4  226.38    7.40
   2   3   4  218.68    5.90
  -3  -3  -4  137.99    4.50
  -3  -3  -4  135.59    5.90
   3  -3   4  133.59    6.00
   3   3   4  129.09    4.70
  -4  -3  -4  515.05   13.40
   4  -3   4  529.65   13.80
   4   3   4  530.45   12.40
  -5  -3  -4  939.51   20.90
   5  -3   4  933.01   21.20
   5   3   4  951.50   20.10
  -6  -3  -4   19.30    3.30
   6  -3   4   15.10    3.10
   7  -3   4  229.38    9.80
  -7  -3  -4  229.58    9.50
  -8  -3  -4    8.90    2.70
   8  -3   4    5.80    2.70
   9  -3   4    7.50    3.10
  -9  -3  -4    7.60    3.20
   9  -4  -4   40.20    5.50
   9   4  -4   31.10    5.60
   8  -4  -4   30.00    4.60
   8   4  -4   19.70    4.40
   7  -4  -4   66.49    5.40
   7   4  -4   62.19    6.90
   6  -4  -4   55.79    4.60
   6   4  -4   58.39    6.30
   5  -4  -4  233.78    8.30
  -5  -4   4  244.18    8.10
   5   4  -4  230.48   10.00
  -4  -4   4   21.20    2.60
   4  -4  -4   26.40    3.00
   4   4  -4   15.60    3.20
  -3  -4   4  410.86    9.60
   3  -4  -4  419.06   10.30
   3   4  -4  388.76   12.70
   2  -4  -4  620.14   14.80
   2  -4  -4  594.94   12.90
  -2  -4   4  612.04   12.10
   2   4  -4  609.94   16.30
   1  -4  -4  152.68    4.90
   1  -4  -4  154.88    6.10
  -1  -4   4  159.88    4.30
   1   4  -4  160.18    7.50
   0  -4  -4   52.99    3.50
   0  -4  -4   44.30    2.50
   0  -4   4   50.49    2.00
   0   4  -4   46.80    4.60
  -1  -4  -4   65.39    3.60
   1   4   4   67.09    3.40
  -1   4  -4   66.19    4.80
  -2  -4  -4  366.26   10.60
  -2  -4  -4  346.87    8.70
   2  -4   4  350.26   10.80
   2   4   4  312.77   11.80
  -3  -4  -4 1639.24   31.20
  -3  -4  -4 1602.64   28.80
   3  -4   4 1562.74   31.50
  -4  -4  -4  271.87    9.50
   4  -4   4  267.27    9.80
  -5  -4  -4   92.59    5.80
   5  -4   4   85.79    5.70
  -6  -4  -4   22.20    3.60
   6  -4   4   15.70    3.10
  -7  -4  -4    8.10    2.60
   7  -4   4   14.40    3.60
  -8  -4  -4   34.60    4.90
   8  -4   4   45.10    5.80
   8  -5  -4   12.80    3.50
   8   5  -4   13.90    4.10
   7  -5  -4   49.90    5.50
   7   5  -4   42.40    6.10
  -6  -5   4   42.50    4.60
   6  -5  -4   40.90    4.70
   6   5  -4   36.10    5.70
   5  -5  -4   64.79    4.70
  -5  -5   4   60.59    4.20
   5   5  -4   56.29    6.20
  -4  -5   4    2.70    1.30
   4  -5  -4    1.00    1.50
   4   5  -4    3.30    2.40
  -3  -5   4   29.10    2.90
   3  -5  -4   33.80    3.50
   3   5  -4   25.80    4.10
   2  -5  -4  138.09    5.50
   2  -5  -4  138.09    6.70
   2   5  -4  150.38    8.00
   1  -5  -4  251.87    8.70
   1  -5  -4  241.08    7.30
   1   5  -4  247.98   10.30
   0  -5  -4   79.59    4.60
   0   5  -4   75.09    5.80
  -1  -5  -4   51.49    3.60
  -1   5  -4   61.89    6.10
  -2  -5  -4  215.48    8.50
   2  -5   4  218.38    9.00
  -2  -5  -4  229.78    7.20
  -3  -5  -4  104.39    6.00
   3  -5   4   92.99    6.00
  -4  -5  -4   67.69    5.20
   4  -5   4   76.19    5.70
  -5  -5  -4  143.49    7.60
   5  -5   4  136.19    7.80
   6  -5   4   48.10    5.50
  -6  -5  -4   54.69    6.00
  -7  -5  -4    9.50    3.20
   7  -5   4    4.70    2.90
   7  -6  -4    0.30    2.10
   7   6  -4    1.60    2.70
   6  -6  -4   41.40    4.90
   6   6  -4   46.10    6.60
   5  -6  -4  171.78    8.00
   5   6  -4  178.28   10.20
   4  -6  -4    1.00    1.70
   4   6  -4    1.30    2.40
   3  -6  -4   47.30    5.10
   3  -6  -4   47.30    5.00
   3   6  -4   56.89    6.70
   2  -6  -4  287.97   10.40
   2   6  -4  273.87   12.00
   1  -6  -4   15.20    2.90
   1   6  -4   12.60    3.40
   0  -6  -4  343.57   10.70
   0   6  -4  335.67   13.20
  -1  -6  -4  272.07    8.80
  -1   6  -4  252.97   11.30
  -2  -6  -4    4.80    2.10
   2  -6   4    6.20    2.70
   3  -6   4   74.89    5.90
  -3  -6  -4   80.29    5.80
  -4  -6  -4   80.99    6.00
   4  -6   4   95.49    6.90
  -5  -6  -4   28.00    4.30
   5  -6   4   27.90    4.70
   6  -6   4   18.80    4.00
  -6  -6  -4   24.20    4.30
   6  -7  -4   14.60    3.90
   6   7  -4   12.70    4.50
   5  -7  -4   65.09    6.80
   5   7  -4   81.49    9.20
   4  -7  -4   23.80    4.40
   4   7  -4   17.90    4.70
   3  -7  -4    9.60    3.10
   3   7  -4    6.70    3.30
   2  -7  -4  106.39    6.90
   2   7  -4  100.79    8.00
   1  -7  -4   90.29    6.10
   1   7  -4   79.39    7.90
   0  -7  -4   11.90    2.80
   0   7  -4   15.10    3.90
  -1  -7  -4    3.30    2.00
   2  -7   4   21.60    4.00
  -2  -7  -4   25.80    4.20
  -3  -7  -4    8.90    2.80
   3  -7   4    7.40    3.10
  -4  -7  -4   39.60    5.00
   4  -7   4   37.70    5.40
  -5  -7  -4   11.80    3.30
   5  -7   4   13.00    4.10
   4  -8  -4   41.30    5.90
   4   8  -4   31.90    6.10
   3  -8  -4   94.89    8.50
   3   8  -4   66.19    8.30
   2  -8  -4   19.20    3.90
   2   8  -4   25.80    5.30
   1  -8  -4   64.19    6.40
   1   8  -4   53.49    7.20
   0   8  -4   98.29    9.30
   1  -8   4    0.80    2.70
  -1  -8  -4    4.10    2.40
  -2  -8  -4   52.59    6.10
   2  -8   4   64.19    7.40
   3  -8   4   92.99    8.80
  -3  -8  -4   89.89    7.90
  10   0  -5   23.30    5.20
   9   0  -5   64.29    6.90
   8   0  -5   -0.10    2.20
   7   0  -5  220.18    9.40
   6   0  -5   35.00    4.10
   5   0  -5   88.89    4.90
   5   0  -5   93.89    4.00
   4   0  -5    1.80    1.00
   4   0  -5    2.10    1.20
   3   0  -5  227.58    6.20
   3   0  -5  232.48    6.90
   2   0  -5   52.39    2.80
   2   0  -5   51.79    2.60
   1   0  -5  554.74   11.20
   1   0  -5  562.34   11.10
   0   0  -5  287.97    6.50
   0   0  -5  279.97    6.90
  -1   0  -5  214.78    5.30
   1   0   5  210.78    5.00
  -1   0  -5  209.58    5.90
  -2   0  -5  653.73   12.60
  -2   0  -5  644.54   13.50
   2   0   5  653.23   12.40
  -3   0  -5  882.81   16.60
  -3   0  -5  868.81   17.60
   3   0   5  885.51   16.60
  -4   0  -5  157.38    6.10
   4   0   5  161.28    5.50
  -4   0  -5  151.98    5.40
  -5   0  -5  111.99    5.60
  -5   0  -5  112.79    5.00
   5   0   5  122.49    5.20
  -6   0  -5   53.89    4.60
   6   0   5   52.79    4.00
   7   0   5    3.30    2.00
   8   0   5   81.79    6.00
   9   0   5  112.79    7.60
  10  -1  -5   36.50    6.70
  10   1  -5   35.20    6.60
   9  -1  -5  147.59    8.90
   9   1  -5  142.39    9.20
   8  -1  -5   48.50    5.50
   8   1  -5   43.20    5.50
   7  -1  -5  189.98    8.40
   7   1  -5  181.48    8.90
   6  -1  -5   87.29    4.70
   6  -1  -5   74.79    5.00
   6   1  -5   83.49    5.50
   5  -1  -5   75.09    4.40
   5  -1  -5   74.19    4.10
   5   1  -5   78.89    5.00
   4  -1  -5   18.50    2.40
   4  -1  -5   24.20    2.70
   4   1  -5   21.00    1.90
   4   1  -5   20.10    3.00
   3  -1  -5  876.21   17.50
   3  -1  -5  927.91   17.40
   3   1  -5  893.61   16.20
   3   1  -5  934.41   18.80
   2  -1  -5  585.94   12.50
   2  -1  -5  597.44   11.70
   2   1  -5  589.04   11.50
   2   1  -5  615.24   13.30
   1  -1  -5  959.30   17.90
   1  -1  -5  952.80   16.30
   1   1  -5  967.60   17.40
   1   1  -5  966.50   18.60
   0  -1  -5 1137.59   20.50
   0  -1  -5 1101.39   18.00
   0   1  -5 1165.48   21.30
   0   1  -5 1184.68   20.70
  -1  -1  -5  205.48    5.80
   1   1   5  208.08    4.00
  -1   1  -5  207.88    6.20
  -1   1  -5  222.68    6.40
  -1   1  -5  212.78    4.40
   2  -1   5 1198.28   22.00
  -2  -1  -5 1253.97   22.00
  -2  -1  -5 1201.48   22.10
   2   1   5 1171.38   20.00
  -2   1  -5 1228.18   22.90
  -2   1  -5 1217.98   20.20
  -3  -1  -5   15.20    2.10
  -3  -1  -5   16.50    2.10
   3  -1   5   15.30    2.00
  -3   1  -5   22.60    2.80
   3   1   5   15.50    1.70
  -3   1  -5   15.10    1.60
   4  -1   5  365.16    9.70
  -4  -1  -5  361.06    9.70
  -4  -1  -5  362.56    9.50
  -4   1  -5  368.96    8.90
   4   1   5  378.76    8.90
  -4   1  -5  367.56   10.70
  -5  -1  -5   52.59    3.70
   5  -1   5   57.39    3.90
  -5  -1  -5   57.49    3.80
   5   1   5   56.69    3.60
   6  -1   5  287.17    9.50
  -6  -1  -5  282.57    9.40
   6   1   5  285.67    9.10
  -7  -1  -5    1.30    1.60
   7  -1   5    0.40    1.80
   7   1   5    0.10    1.50
   8  -1   5   37.60    4.90
   8   1   5   38.60    5.60
   9  -1   5   13.90    3.50
   9  -2  -5    3.90    2.90
   9   2  -5    7.40    3.30
   8  -2  -5  123.89    7.50
   8   2  -5  126.79    8.10
   7  -2  -5  165.68    7.30
   7  -2  -5  161.88    7.80
   7   2  -5  169.38    8.70
   6  -2  -5  155.48    6.80
   6  -2  -5  149.88    6.90
   6   2  -5  152.68    7.80
   5  -2  -5   82.19    4.80
   5  -2  -5   80.19    4.50
   5   2  -5   75.19    5.30
   4  -2  -5   46.60    3.50
   4  -2  -5   43.80    3.00
   4   2  -5   42.70    2.30
   4   2  -5   46.80    4.60
   3  -2  -5   57.89    3.00
   3  -2  -5   53.39    3.60
   3   2  -5   59.79    4.10
   3   2  -5   52.99    2.40
   2  -2  -5  140.89    5.40
   2  -2  -5  155.78    4.30
   2   2  -5  155.08    4.60
   2   2  -5  155.58    6.30
   1  -2  -5  804.12   13.50
   1  -2  -5  791.72   16.00
   1   2  -5  799.42   15.50
   1   2  -5  806.82   17.30
   0  -2  -5 2267.57   38.00
   0   2  -5 2219.98   38.10
   0   2  -5 2275.97   39.70
  -1  -2  -5 1906.71   32.60
  -1   2  -5 1872.91   33.70
  -1   2  -5 1962.40   34.60
  -2  -2  -5  365.86    9.60
   2  -2   5  368.76    9.60
  -2  -2  -5  371.46    8.70
   2   2   5  368.16    7.30
  -2   2  -5  369.56   10.10
  -3  -2  -5  142.29    5.00
  -3  -2  -5  145.79    5.80
   3  -2   5  149.69    5.90
  -3   2  -5  140.29    6.20
   3   2   5  146.09    4.40
  -4  -2  -5  109.09    4.50
  -4  -2  -5   98.89    5.00
   4  -2   5  102.29    5.20
   4   2   5  105.09    4.30
  -5  -2  -5   98.59    5.20
   5  -2   5   78.09    4.80
   5   2   5   83.39    4.40
   6  -2   5   70.59    4.90
  -6  -2  -5   76.29    5.00
  -7  -2  -5   31.30    4.10
   7  -2   5   35.10    4.60
   8  -2   5   76.79    6.00
  -8  -2  -5   67.39    6.30
   9  -2   5  147.09    8.80
   9  -3  -5   91.49    7.30
   9   3  -5  101.69    9.90
   8  -3  -5   95.99    6.40
   8  -3  -5   84.99    6.50
   8   3  -5   84.99    8.20
   7  -3  -5   54.09    5.30
   7  -3  -5   54.19    5.40
   7   3  -5   52.29    6.40
   6  -3  -5    8.30    2.50
   6  -3  -5    7.50    2.30
   6   3  -5    5.90    2.60
   5  -3  -5   29.20    3.60
   5  -3  -5   30.40    3.30
   5   3  -5   25.60    4.00
   4  -3  -5  180.88    6.30
   4  -3  -5  161.38    6.90
   4   3  -5  181.68    8.00
   3  -3  -5   31.60    2.40
   3  -3  -5   38.80    3.90
   3   3  -5   30.00    2.00
   3   3  -5   35.30    4.20
   2  -3  -5  385.56    8.40
   2  -3  -5  379.86   10.40
   2   3  -5  387.26   11.70
   2   3  -5  383.36    9.00
   1  -3  -5  198.28    6.70
   1  -3  -5  189.28    4.60
   1   3  -5  185.68    7.60
   1   3  -5  191.78    6.10
   0  -3  -5   57.79    1.90
   0  -3  -5   55.09    3.40
   0   3  -5   60.69    4.40
   0   3  -5   52.99    3.50
  -1  -3  -5  314.57    8.20
  -1   3  -5  316.07   10.10
  -1   3  -5  312.77    9.30
   1   3   5  301.37    6.20
  -2  -3  -5   27.30    3.10
  -2  -3  -5   26.50    2.50
   2  -3   5   29.90    3.50
  -2   3  -5   30.20    3.50
   3  -3   5  390.26   11.20
  -3  -3  -5  383.06    9.30
  -3  -3  -5  392.76   11.00
  -4  -3  -5  252.27    8.70
   4  -3   5  227.58    8.50
   5  -3   5  146.09    7.00
  -5  -3  -5  145.19    6.90
   6  -3   5  136.89    7.10
  -6  -3  -5  130.79    6.90
  -7  -3  -5    1.40    1.70
   7  -3   5    2.70    2.10
   8  -3   5   85.19    6.60
  -8  -3  -5   88.49    6.40
   8  -4  -5    2.50    2.30
   8  -4  -5    4.90    2.70
   8   4  -5    8.50    3.60
   7  -4  -5   21.30    3.70
   7  -4  -5   14.50    3.40
   7   4  -5   22.50    4.90
   6  -4  -5   12.00    2.70
   6  -4  -5   10.90    2.80
   6   4  -5   16.20    4.00
   5  -4  -5   15.80    3.10
   5  -4  -5   21.90    3.10
   5   4  -5   26.60    4.50
   4  -4  -5   14.80    2.90
   4  -4  -5   18.40    2.50
   4   4  -5   18.80    3.80
   3  -4  -5  360.86    9.20
   3  -4  -5  352.86   11.00
  -3  -4   5  356.56    8.70
   3   4  -5  371.96   12.60
  -2  -4   5   49.80    2.40
   2  -4  -5   45.00    4.10
   2  -4  -5   47.20    2.70
   2   4  -5   46.80    4.90
   1  -4  -5   53.49    2.60
   1  -4  -5   59.19    4.00
   1   4  -5   58.89    4.80
   0  -4  -5   44.00    3.40
   0   4  -5   47.50    5.10
  -1  -4  -5  132.89    5.40
  -1   4  -5  127.79    6.80
   2  -4   5   27.60    3.60
  -2  -4  -5   24.10    3.20
  -2  -4  -5   22.00    2.60
   3  -4   5   54.09    4.50
  -3  -4  -5   56.99    5.00
  -3  -4  -5   53.79    3.20
  -4  -4  -5  377.16   11.80
   4  -4   5  367.36   12.00
  -5  -4  -5   14.90    2.90
   5  -4   5   13.90    3.00
  -6  -4  -5  154.28    7.80
   6  -4   5  152.18    8.00
   7  -4   5    3.20    2.10
  -7  -4  -5    4.90    2.30
   8  -4   5   27.90    4.90
  -8  -4  -5   21.00    4.20
   8  -5  -5   13.50    3.60
   8  -5  -5   17.40    3.90
   8   5  -5   14.40    4.30
   7  -5  -5   -1.50    2.00
   7  -5  -5    0.30    2.00
   7   5  -5    2.80    2.70
   6  -5  -5   30.00    4.50
   6  -5  -5   20.90    3.60
   6   5  -5   27.00    5.10
   5  -5  -5   47.50    5.20
   5  -5  -5   47.90    4.70
  -5  -5   5   37.70    4.20
   5   5  -5   48.40    6.30
   4  -5  -5  328.07   11.40
   4  -5  -5  310.07    9.60
   4   5  -5  322.47   12.90
   3  -5  -5   32.70    4.20
   3  -5  -5   31.50    3.30
   3   5  -5   33.60    4.80
   2  -5  -5   94.89    5.70
   2   5  -5  102.29    6.90
   1  -5  -5  381.96   11.40
   1   5  -5  401.56   13.80
   0  -5  -5   81.19    4.80
   0   5  -5   88.69    6.20
  -1  -5  -5  370.56   10.50
  -1   5  -5  391.76   13.40
   2  -5   5  311.97   11.10
  -2  -5  -5  301.97    8.90
  -2  -5  -5  303.07   10.50
   3  -5   5   36.30    4.70
  -3  -5  -5   27.90    3.80
  -4  -5  -5   38.60    4.80
   4  -5   5   36.90    4.60
  -5  -5  -5  187.48    8.80
   5  -5   5  189.88    9.20
   6  -5   5   61.99    6.40
  -6  -5  -5   47.90    5.50
   7  -5   5   28.00    4.90
  -7  -5  -5   20.50    4.00
   7  -6  -5    1.20    2.60
   7  -6  -5    5.10    3.10
   7   6  -5   -2.30    2.60
   6  -6  -5   52.69    6.10
   6   6  -5   67.19    8.10
   5  -6  -5   90.19    6.80
   5   6  -5   80.89    8.60
   4  -6  -5   19.60    3.70
   4   6  -5   23.80    4.90
   3  -6  -5  113.69    6.90
   3   6  -5  108.99    8.00
   2  -6  -5    3.90    2.10
   2   6  -5    0.40    2.30
   1  -6  -5   28.20    3.80
   1   6  -5   30.10    5.10
   0  -6  -5  444.76   12.80
   0   6  -5  439.96   15.70
  -1  -6  -5  507.75   13.50
  -1   6  -5  534.95   17.20
   2  -6   5    2.30    2.30
  -2  -6  -5    2.50    2.00
  -3  -6  -5  114.29    7.00
   3  -6   5  109.69    7.40
  -4  -6  -5  122.69    7.40
   4  -6   5  122.79    7.70
  -5  -6  -5   17.30    3.90
   5  -6   5   20.00    4.30
   6  -6   5   13.10    4.00
  -6  -6  -5   21.30    4.10
   6  -7  -5    7.40    3.60
   6   7  -5    8.80    3.90
   5  -7  -5   25.50    4.90
   5   7  -5   32.60    5.90
   4  -7  -5  123.59    8.10
   4   7  -5  107.69    8.80
   3  -7  -5   -0.40    1.90
   3   7  -5   -0.90    2.40
   2  -7  -5   65.99    6.40
   2   7  -5   91.89    9.00
   1  -7  -5   43.80    5.10
   1   7  -5   44.80    6.40
   0  -7  -5    0.40    1.80
   0   7  -5    5.70    3.10
   2  -7   5    7.70    3.10
  -2  -7  -5    9.50    3.10
  -3  -7  -5   33.00    4.60
   3  -7   5   49.99    6.50
  -4  -7  -5    2.40    2.50
   4  -7   5    6.20    3.30
   5  -7   5   56.59    6.80
  -5  -7  -5   74.49    7.30
   3  -8  -5   44.60    6.00
   3   8  -5   42.00    7.00
   2  -8  -5   97.09    7.30
   2   8  -5   93.49    9.80
   1  -8  -5    5.70    2.60
   1   8  -5    3.60    3.20
   0   8  -5   61.49    8.00
  -1  -8  -5   91.09    6.90
   1  -8   5   78.19    8.00
  -2  -8  -5   -3.20    1.70
   2  -8   5    4.10    3.00
   3  -8   5   68.79    7.90
  -3  -8  -5   57.59    6.30
   9   0  -6   -0.80    2.60
   8   0  -6  131.59    8.00
   7   0  -6    8.80    2.70
   6   0  -6   60.29    4.90
   5   0  -6   30.00    2.80
   5   0  -6   33.80    3.90
   4   0  -6    8.10    1.60
   4   0  -6    6.20    1.90
   3   0  -6  194.68    5.90
   3   0  -6  207.98    6.70
   2   0  -6  165.48    5.20
   2   0  -6  176.28    5.60
   1   0  -6   37.70    2.40
   1   0  -6   39.90    2.50
   0   0  -6  838.42   16.00
   0   0  -6  806.72   15.30
  -1   0  -6  446.46   10.20
   1   0   6  414.96    8.60
   2   0   6   36.40    2.20
  -2   0  -6   39.00    2.90
  -2   0  -6   35.90    2.20
   3   0   6  276.77    7.10
  -3   0  -6  273.37    7.20
  -3   0  -6  263.17    8.20
  -4   0  -6  101.69    5.20
  -4   0  -6  111.19    4.60
   4   0   6  109.69    4.50
  -5   0  -6  246.38    7.80
   5   0   6  263.87    8.00
  -5   0  -6  240.68    8.70
   6   0   6   20.10    2.90
  -6   0  -6   12.60    2.70
  -6   0  -6   16.40    2.70
   7   0   6  233.28    9.00
   8   0   6   28.80    4.20
   9  -1  -6    4.60    3.00
   9   1  -6    7.20    3.10
   8  -1  -6  170.88    8.90
   8   1  -6  158.78    9.10
   7  -1  -6   93.69    6.20
   7   1  -6   84.99    6.40
   6  -1  -6  585.64   15.20
   6  -1  -6  579.24   13.90
   6   1  -6  556.04   16.00
   5  -1  -6  229.48    7.50
   5  -1  -6  230.18    8.00
   5   1  -6  215.18    8.50
   4  -1  -6  221.18    7.00
   4  -1  -6  209.98    7.00
   4   1  -6  202.68    5.70
   4   1  -6  209.68    7.80
   3  -1  -6   44.90    2.90
   3  -1  -6   47.40    3.10
   3   1  -6   46.40    2.60
   3   1  -6   47.50    3.60
   2  -1  -6   29.40    2.80
   2  -1  -6   28.40    2.10
   2   1  -6   26.80    2.80
   2   1  -6   28.20    2.10
   1  -1  -6 1605.24   28.10
   1  -1  -6 1571.64   26.10
   1   1  -6 1592.54   28.60
   1   1  -6 1583.64   27.60
   0  -1  -6  505.85    8.90
   0  -1  -6  497.85   11.20
   0   1  -6  526.65   11.80
  -1  -1  -6  398.06    9.50
  -1   1  -6  414.36   10.00
  -1   1  -6  407.76    7.70
  -1   1  -6  413.76   10.00
   1   1   6  399.66    7.10
  -2  -1  -6  160.08    5.50
   2  -1   6  167.28    5.50
  -2  -1  -6  162.28    5.60
  -2   1  -6  167.18    4.30
   2   1   6  158.08    4.00
  -2   1  -6  166.98    6.10
  -3  -1  -6  248.98    7.50
  -3  -1  -6  265.17    7.70
   3  -1   6  264.67    7.50
  -3   1  -6  254.37    6.40
  -3   1  -6  255.47    8.40
   3   1   6  262.57    6.30
  -4  -1  -6    6.20    1.60
   4  -1   6    5.90    1.60
  -4  -1  -6    1.80    1.30
   4   1   6    3.90    1.20
  -4   1  -6    3.70    1.60
  -4   1  -6    5.90    1.30
  -5  -1  -6    5.10    1.80
   5  -1   6    5.60    1.80
  -5  -1  -6    4.60    1.70
   5   1   6    4.90    1.50
  -5   1  -6    6.20    2.10
   6  -1   6   35.30    4.00
  -6  -1  -6   25.10    3.40
   6   1   6   28.00    3.60
   7  -1   6   15.60    3.00
  -7  -1  -6   17.20    3.10
   8  -1   6   19.00    3.90
  -8  -1  -6   13.60    3.20
   9  -1   6   41.60    5.50
   9  -2  -6   15.90    3.90
   9   2  -6   10.10    4.20
   8  -2  -6   22.90    4.10
   8   2  -6   22.90    4.90
   7  -2  -6   13.10    2.80
   7  -2  -6    7.30    2.60
   7   2  -6    8.50    3.00
   6  -2  -6   55.69    4.60
   6  -2  -6   54.99    4.40
   6   2  -6   64.69    6.30
   5  -2  -6   83.19    4.80
   5  -2  -6   82.39    4.90
   5   2  -6   96.59    6.10
   4  -2  -6  323.47    8.90
   4  -2  -6  320.57    9.60
   4   2  -6  326.07   10.70
   4   2  -6  325.07    7.60
   3  -2  -6  441.86   11.40
   3  -2  -6  448.26   10.20
   3   2  -6  466.25   12.70
   3   2  -6  459.95    9.80
   2  -2  -6   97.19    4.60
   2  -2  -6  101.39    3.50
   2   2  -6   98.99    3.90
   2   2  -6   92.59    5.00
   1  -2  -6   95.69    4.40
   1  -2  -6   92.89    2.70
   1   2  -6   97.39    5.10
   1   2  -6   97.39    4.10
   0  -2  -6  213.48    6.60
   0   2  -6  210.18    6.60
   0   2  -6  220.38    7.70
  -1  -2  -6  498.95   11.40
  -1   2  -6  507.45   12.70
  -2  -2  -6  137.59    5.60
  -2  -2  -6  151.78    5.30
   2  -2   6  152.18    5.80
  -2   2  -6  139.19    6.00
  -3  -2  -6  104.89    4.60
  -3  -2  -6  115.49    5.20
   3  -2   6  114.29    5.20
  -3   2  -6  113.39    5.80
  -4  -2  -6  122.99    5.70
   4  -2   6  120.49    5.70
  -4  -2  -6  123.99    5.20
  -4   2  -6  116.99    6.40
   5  -2   6   76.59    4.80
  -5  -2  -6   75.09    4.80
  -6  -2  -6   21.20    3.30
   6  -2   6   21.20    3.50
  -7  -2  -6   82.39    5.70
   7  -2   6   85.19    5.90
  -8  -2  -6   19.90    3.70
   8  -2   6   22.10    4.20
   9  -3  -6   10.50    3.80
   9   3  -6    8.40    3.60
   8  -3  -6   11.10    3.10
   8  -3  -6   16.40    3.40
   8   3  -6   17.60    4.30
   7  -3  -6  129.79    7.10
   7  -3  -6  124.99    7.10
   7   3  -6  141.39    8.60
   6  -3  -6  298.07   10.50
   6  -3  -6  277.27    9.70
   6   3  -6  303.27   12.10
   5  -3  -6   77.49    5.10
   5  -3  -6   79.49    4.60
   5   3  -6   86.69    6.20
   4  -3  -6  354.46   10.80
   4  -3  -6  343.77    9.40
   4   3  -6  344.47   11.80
   3  -3  -6  908.31   17.60
   3  -3  -6  915.01   20.00
   3   3  -6  935.21   21.60
   3   3  -6  910.61   17.40
   2  -3  -6  222.88    7.70
   2  -3  -6  228.38    5.80
   2   3  -6  232.78    6.90
   2   3  -6  225.38    8.90
   1  -3  -6 1683.03   30.50
   1  -3  -6 1612.44   26.50
   1   3  -6 1617.24   32.40
   1   3  -6 1674.03   29.90
   0  -3  -6  184.28    6.50
   0   3  -6  187.68    7.80
   0   3  -6  174.88    6.50
  -1  -3  -6   16.90    2.30
  -1   3  -6   19.90    2.90
  -1   3  -6   19.70    3.20
  -2  -3  -6  124.49    5.80
  -2  -3  -6  134.99    5.10
   2  -3   6  117.69    5.80
  -2   3  -6  132.19    6.30
  -3  -3  -6   35.50    3.80
   3  -3   6   37.80    3.90
  -3  -3  -6   38.50    2.90
   4  -3   6   54.89    5.00
  -4  -3  -6   46.90    4.40
   5  -3   6    8.40    2.50
  -5  -3  -6    3.90    2.00
  -6  -3  -6   65.19    5.70
   6  -3   6   66.39    5.20
  -7  -3  -6   15.40    3.40
   7  -3   6   10.70    2.90
  -8  -3  -6   18.80    3.80
   8  -3   6   21.30    4.10
   8  -4  -6   35.50    4.90
   8  -4  -6   34.20    4.90
   8   4  -6   29.20    5.70
   7  -4  -6    0.10    2.10
   7  -4  -6   -1.90    1.60
   7   4  -6    0.20    2.20
   6  -4  -6   47.50    5.30
   6  -4  -6   37.50    4.30
   6   4  -6   37.20    5.30
   5  -4  -6   59.19    5.70
   5  -4  -6   53.59    4.10
   5   4  -6   58.69    6.50
   4  -4  -6  393.66   12.30
   4  -4  -6  377.66   10.30
   4   4  -6  412.06   14.00
   3  -4  -6  513.65   14.10
   3  -4  -6  514.15   11.70
   3   4  -6  525.45   15.90
   2  -4  -6 1188.18   24.60
   2   4  -6 1152.98   26.60
   2   4  -6 1177.28   22.70
   1  -4  -6  357.46   10.40
   1   4  -6  338.87   12.00
   1   4  -6  364.96   10.10
   0  -4  -6  136.89    5.90
   0   4  -6  121.09    7.00
  -1  -4  -6   53.69    3.70
  -1   4  -6   45.50    4.90
   2  -4   6   26.00    3.70
  -2  -4  -6   19.00    3.00
  -2  -4  -6   23.20    2.80
  -3  -4  -6  143.19    5.50
   3  -4   6  135.59    7.00
  -3  -4  -6  133.99    6.80
  -4  -4  -6  113.79    6.30
   4  -4   6   94.79    6.10
   5  -4   6   -2.30    1.50
  -5  -4  -6    1.60    1.80
   6  -4   6    5.20    2.40
  -6  -4  -6    1.70    1.90
  -7  -4  -6   30.80    4.50
   7  -4   6   30.00    4.90
   8  -5  -6   11.80    3.40
   8  -5  -6    5.90    3.20
   8   5  -6    5.90    3.50
   7  -5  -6   43.00    5.70
   7  -5  -6   31.00    4.30
   7   5  -6   35.30    6.10
   6  -5  -6   51.09    5.80
   6  -5  -6   53.69    5.20
   6   5  -6   37.40    6.00
   5  -5  -6   32.20    4.50
   5   5  -6   35.10    5.50
   4  -5  -6   81.49    5.90
   4   5  -6   73.39    7.30
   3  -5  -6   42.60    4.90
   3   5  -6   29.60    4.80
   2  -5  -6  276.97   10.00
   2   5  -6  272.37   11.60
   1  -5  -6   16.40    2.90
   1   5  -6   15.60    3.40
   0  -5  -6  161.08    6.90
   0   5  -6  167.48    8.80
  -1  -5  -6  271.87    8.90
  -1   5  -6  269.67   11.10
  -2  -5  -6  228.48    9.20
  -2  -5  -6  233.98    7.90
   2  -5   6  223.18    9.40
   3  -5   6  118.59    7.10
  -3  -5  -6  119.79    6.90
   4  -5   6    9.40    2.80
  -4  -5  -6   13.90    3.30
  -5  -5  -6   -0.30    1.60
   5  -5   6    2.00    2.30
   6  -5   6    2.10    2.30
  -6  -5  -6    2.30    2.20
   7  -5   6   97.49    7.40
  -7  -5  -6   74.09    7.10
   7  -6  -6   23.50    4.60
   7   6  -6   23.30    5.30
   6  -6  -6   10.70    3.50
   6   6  -6    4.00    3.30
   5  -6  -6   31.10    4.80
   5   6  -6   37.40    5.90
   4  -6  -6    6.50    3.00
   4   6  -6    6.50    3.20
   3  -6  -6  109.29    7.00
   3   6  -6  116.69    8.50
   2  -6  -6   28.70    4.20
   2   6  -6   29.00    5.10
   1  -6  -6   50.59    5.00
   1   6  -6   60.39    6.90
   0  -6  -6   88.39    5.60
   0   6  -6   98.29    7.40
  -1  -6  -6  170.08    7.30
  -1   6  -6  159.88    9.20
  -2  -6  -6   18.70    3.50
   2  -6   6   14.40    3.40
   3  -6   6  154.58    8.80
  -3  -6  -6  160.28    8.40
   4  -6   6   34.90    4.90
  -4  -6  -6   31.90    4.70
   5  -6   6    5.40    2.90
  -5  -6  -6    4.00    2.40
  -6  -6  -6   36.80    5.40
   6  -6   6   36.30    5.70
   5  -7  -6   27.90    5.00
   5   7  -6   41.20    7.10
   4  -7  -6   34.90    5.50
   4   7  -6   31.80    6.00
   3  -7  -6   34.30    4.90
   3   7  -6   33.90    6.30
   2  -7  -6   10.30    3.20
   2   7  -6   13.60    4.20
   1  -7  -6    5.20    2.50
   1   7  -6    8.60    3.90
   0  -7  -6    5.60    2.30
   0   7  -6   13.00    4.00
  -1   7  -6  102.29    8.20
  -2  -7  -6  135.99    8.10
   2  -7   6  124.79    8.40
   3  -7   6    4.50    3.20
  -3  -7  -6    4.70    2.70
   4  -7   6    5.10    3.30
  -4  -7  -6    5.10    2.80
   3  -8  -6    7.80    3.50
   3   8  -6   11.00    4.20
   2  -8  -6   67.89    7.00
   2   8  -6   57.69    7.80
   1  -8  -6    5.30    2.60
   1   8  -6    6.20    3.20
   0   8  -6    7.60    3.70
  -1  -8  -6   35.10    5.10
   1  -8   6   27.30    5.30
   2  -8   6  100.89    8.20
  -2  -8  -6   91.69    8.10
   9   0  -7    0.60    2.80
   8   0  -7   31.50    5.00
   7   0  -7    3.60    2.50
   6   0  -7    1.30    1.90
   5   0  -7   11.20    2.10
   5   0  -7   11.70    2.80
   4   0  -7    4.80    1.80
   4   0  -7    8.70    1.70
   3   0  -7  248.98    7.70
   3   0  -7  233.28    7.00
   2   0  -7    5.40    1.50
   2   0  -7    3.40    1.30
   1   0  -7   11.90    1.80
   1   0  -7    7.30    1.40
   0   0  -7  328.47    8.60
   0   0  -7  329.97    7.90
   1   0   7  166.28    4.70
  -1   0  -7  162.28    5.80
  -2   0  -7  647.94   14.50
   2   0   7  639.04   12.60
  -2   0  -7  638.44   12.90
  -3   0  -7   28.30    2.70
  -3   0  -7   28.30    3.30
   3   0   7   28.10    2.20
  -4   0  -7  303.27    9.60
  -4   0  -7  297.47    8.30
   4   0   7  290.57    8.10
  -5   0  -7   57.69    4.50
  -5   0  -7   59.19    3.80
   5   0   7   57.99    3.90
   6   0   7    8.30    2.20
  -6   0  -7   12.60    2.50
  -6   0  -7    7.30    2.50
   9  -1  -7  124.89    8.50
   9   1  -7  105.09    8.40
   8  -1  -7  197.08    9.80
   8   1  -7  211.68   10.70
   7  -1  -7   93.49    6.40
   7   1  -7   91.39    6.90
   6  -1  -7  214.68    8.70
   6  -1  -7  230.88    8.00
   6   1  -7  207.58    9.30
   5  -1  -7   70.39    4.30
   5  -1  -7   68.29    4.60
   5   1  -7   70.89    5.20
   4  -1  -7   11.90    2.10
   4  -1  -7   14.60    2.40
   4   1  -7   12.10    1.70
   4   1  -7    8.70    2.40
   3  -1  -7   20.80    2.60
   3  -1  -7   17.10    2.30
   3   1  -7   18.70    2.20
   3   1  -7   20.40    3.00
   2  -1  -7  374.76    8.80
   2  -1  -7  380.56    9.80
   2   1  -7  379.66    9.10
   2   1  -7  379.66   10.40
   1  -1  -7  258.67    7.60
   1  -1  -7  256.57    6.10
   1   1  -7  264.17    7.90
   1   1  -7  265.77    7.40
   0  -1  -7  289.67    5.90
   0  -1  -7  290.97    8.10
   0   1  -7  315.27    8.60
  -1  -1  -7   67.49    3.70
  -1   1  -7   66.09    2.40
   1   1   7   64.69    2.00
  -1   1  -7   68.59    3.90
  -1   1  -7   63.49    3.70
  -2  -1  -7  415.56   10.50
  -2  -1  -7  417.46   10.30
   2  -1   7  421.76   10.10
   2   1   7  409.96    8.10
  -2   1  -7  411.26    8.50
  -2   1  -7  429.16   11.30
   3  -1   7  156.48    5.70
  -3  -1  -7  144.89    5.80
  -3  -1  -7  156.08    5.80
   3   1   7  152.38    5.00
  -3   1  -7  159.78    6.70
  -3   1  -7  147.29    4.60
   4  -1   7   52.89    3.60
  -4  -1  -7   49.70    3.60
  -4  -1  -7   49.00    3.80
  -4   1  -7   45.90    4.50
  -4   1  -7   54.19    3.10
   5  -1   7  209.48    7.70
  -5  -1  -7  220.58    8.20
  -5  -1  -7  217.38    7.90
  -5   1  -7  218.98    8.90
  -5   1  -7  223.38    9.10
  -6  -1  -7   42.10    4.40
   6  -1   7   35.10    4.00
   7  -1   7   15.60    3.10
  -7  -1  -7   17.20    3.10
  -8  -1  -7    8.30    2.60
   8  -1   7    8.60    3.00
   9  -2  -7  108.49    8.00
   9   2  -7  125.39    9.30
   8  -2  -7    1.50    2.50
   8   2  -7    2.40    3.10
   7  -2  -7  282.77   10.00
   7  -2  -7  263.77   10.30
   7   2  -7  266.37   11.80
   6  -2  -7   31.60    3.80
   6  -2  -7   35.80    4.00
   6   2  -7   40.90    5.50
   5  -2  -7  292.67    9.50
   5  -2  -7  274.07    9.00
   5   2  -7  287.17   10.70
   4  -2  -7  348.77   10.30
   4  -2  -7  336.67    9.40
   4   2  -7  343.27    8.40
   4   2  -7  369.16   11.90
   3  -2  -7  135.89    5.90
   3  -2  -7  136.99    4.90
   3   2  -7  135.69    4.80
   3   2  -7  144.19    6.80
   2  -2  -7  102.89    5.00
   2  -2  -7  108.79    3.80
   2   2  -7  112.99    5.80
   2   2  -7  116.79    4.50
   1  -2  -7  184.08    4.20
   1  -2  -7  185.38    6.60
   1   2  -7  193.38    6.30
   1   2  -7  202.38    7.60
   0  -2  -7  685.53   14.90
   0   2  -7  689.93   16.20
   0   2  -7  666.73   15.00
  -1  -2  -7  291.67    8.20
  -1   2  -7  279.87    8.80
  -1   2  -7  286.77    9.10
  -2  -2  -7   20.20    2.80
  -2  -2  -7   18.30    2.50
   2  -2   7   16.20    2.50
  -2   2  -7   22.70    3.00
   3  -2   7   50.59    3.80
  -3  -2  -7   56.19    3.80
  -3  -2  -7   53.19    3.60
  -3   2  -7   56.69    4.40
   4  -2   7   59.49    4.30
  -4  -2  -7   63.39    4.10
  -4  -2  -7   62.99    4.30
  -4   2  -7   72.39    5.30
  -5  -2  -7   66.79    4.70
   5  -2   7   63.19    4.60
  -6  -2  -7   96.79    5.90
   6  -2   7   96.89    5.90
  -7  -2  -7   78.39    5.70
   7  -2   7   75.99    5.70
  -8  -2  -7   55.89    6.10
   8  -2   7   53.29    6.10
   9  -3  -7   66.39    7.10
   9   3  -7   58.79    7.40
   8  -3  -7   58.49    6.20
   8  -3  -7   50.09    5.90
   8   3  -7   64.09    7.70
   7  -3  -7   92.39    6.40
   7  -3  -7  101.99    6.50
   7   3  -7  110.89    8.20
   6  -3  -7  124.19    6.40
   6  -3  -7  114.99    6.70
   6   3  -7  122.99    8.10
   5  -3  -7  239.08    8.20
   5  -3  -7  226.98    9.10
   5   3  -7  228.28   10.20
   4  -3  -7  199.08    8.10
   4  -3  -7  195.18    6.70
   4   3  -7  204.08    9.20
   3  -3  -7  609.74   13.00
   3  -3  -7  632.64   15.50
   3   3  -7  620.44   13.30
   3   3  -7  630.44   17.10
   2  -3  -7  157.48    6.60
   2   3  -7  154.88    5.70
   2   3  -7  154.98    7.50
   1  -3  -7  330.57    9.80
   1   3  -7  313.07   10.90
   1   3  -7  336.77    9.40
   0  -3  -7  537.95   13.10
   0   3  -7  554.24   15.00
   0   3  -7  527.45   13.40
  -1  -3  -7  297.17    8.70
  -1   3  -7  290.97    9.50
  -1   3  -7  292.87   10.20
  -2  -3  -7   31.60    3.50
   2  -3   7   32.90    3.70
  -2  -3  -7   29.40    3.10
  -2   3  -7   24.00    3.30
  -3  -3  -7   24.90    3.00
   3  -3   7   27.10    3.60
  -3  -3  -7   27.70    3.70
  -3   3  -7   32.90    4.20
  -4  -3  -7   39.60    4.30
  -4  -3  -7   35.20    3.50
   4  -3   7   40.00    4.40
  -5  -3  -7  189.18    8.30
   5  -3   7  209.38    8.70
   6  -3   7   37.50    4.60
  -6  -3  -7   37.90    4.50
  -7  -3  -7   53.99    5.50
   7  -3   7   59.79    6.00
  -8  -3  -7   29.70    4.70
   8  -3   7   27.00    4.50
   8  -4  -7   64.89    6.70
   8  -4  -7   51.09    6.00
   8   4  -7   53.69    7.40
   7  -4  -7   34.90    4.80
   7  -4  -7   20.60    3.70
   7   4  -7   33.60    5.60
   6  -4  -7   42.10    4.50
   6  -4  -7   32.30    4.50
   6   4  -7   39.00    5.70
   5  -4  -7   11.60    2.50
   5  -4  -7   13.80    3.10
   5   4  -7   17.80    4.20
   4  -4  -7   76.99    5.50
   4   4  -7   80.79    6.60
   3  -4  -7  748.03   18.30
   3   4  -7  746.43   20.40
   2  -4  -7  485.35   13.50
   2   4  -7  494.85   12.50
   2   4  -7  501.75   15.60
   1  -4  -7   74.89    4.80
   1   4  -7   60.69    4.20
   1   4  -7   68.69    6.60
   0  -4  -7  105.99    5.40
   0   4  -7  109.69    5.80
   0   4  -7  109.99    6.80
  -1  -4  -7   60.69    4.10
  -1   4  -7   59.29    5.70
  -1   4  -7   60.89    5.40
   2  -4   7   90.09    5.80
  -2  -4  -7  101.79    5.00
  -2  -4  -7   86.39    5.50
  -3  -4  -7  244.98    9.40
   3  -4   7  230.98    9.40
  -3  -4  -7  243.88    7.90
   4  -4   7    4.80    2.30
  -4  -4  -7    5.90    2.20
  -5  -4  -7   57.29    5.40
   5  -4   7   70.39    5.50
  -6  -4  -7    0.50    1.80
   6  -4   7    3.60    2.10
  -7  -4  -7   55.19    6.00
   7  -4   7   54.09    6.10
   7  -5  -7   42.40    5.60
   7   5  -7   32.60    5.90
   6  -5  -7   67.09    6.60
   6   5  -7   82.49    8.90
   5  -5  -7   29.20    4.40
   5   5  -7   37.00    5.80
   4  -5  -7   51.69    5.30
   4   5  -7   49.80    6.20
   3  -5  -7   19.50    3.50
   3   5  -7   22.10    4.40
   2  -5  -7   38.40    4.40
   2   5  -7   44.00    5.90
   1  -5  -7  409.36   12.40
   1   5  -7  421.46   14.90
   0  -5  -7  213.08    8.30
   0   5  -7  212.98   10.30
  -1  -5  -7  103.89    5.60
  -1   5  -7  103.09    7.20
   2  -5   7   43.60    5.10
  -2  -5  -7   44.90    4.10
  -2  -5  -7   52.29    5.40
  -3  -5  -7   73.79    6.60
   3  -5   7   71.99    5.90
  -4  -5  -7   24.00    4.00
   4  -5   7   29.50    4.70
  -5  -5  -7   71.69    6.60
   5  -5   7   68.09    6.80
   6  -5   7   19.50    4.10
  -6  -5  -7   15.40    3.60
   6  -6  -7   54.19    6.50
   6   6  -7   54.89    7.70
   5  -6  -7  136.29    8.50
   5   6  -7  152.78   10.20
   4  -6  -7   96.29    7.10
   4   6  -7   83.09    8.70
   3  -6  -7  110.99    7.30
   3   6  -7  131.29    9.10
   2  -6  -7   57.09    5.70
   2   6  -7   71.79    7.90
   1  -6  -7   31.90    4.30
   1   6  -7   43.60    6.30
   0  -6  -7   92.39    5.90
   0   6  -7   81.29    8.20
  -1  -6  -7   50.79    4.90
  -1   6  -7   60.49    7.10
  -2  -6  -7   47.90    5.60
   2  -6   7   39.80    5.30
  -3  -6  -7  148.49    8.30
   3  -6   7  161.18    9.10
   4  -6   7   78.89    7.80
  -4  -6  -7   78.49    7.10
  -5  -6  -7  197.88   10.10
   5  -6   7  209.78   10.70
   5  -7  -7   66.29    7.00
   5   7  -7   79.29    9.60
   4  -7  -7   43.30    6.10
   4   7  -7   57.09    8.10
   3  -7  -7   85.09    7.80
   3   7  -7   77.99    8.70
   2  -7  -7   11.60    3.30
   2   7  -7   13.20    4.20
   1  -7  -7    8.50    2.90
   1   7  -7    0.30    2.80
   0  -7  -7   41.30    5.00
   0   7  -7   42.40    6.20
  -2  -7  -7  150.08    8.80
   2  -7   7  155.58    9.50
   3  -7   7   98.79    7.80
  -3  -7  -7   80.99    7.60
  -4  -7  -7   96.19    7.40
   2  -8  -7    7.70    3.20
   2   8  -7   14.50    4.30
   1  -8  -7    0.70    2.30
   1   8  -7    0.60    2.90
   0   8  -7   -3.20    2.30
   1  -8   7  105.09    9.80
  -1  -8  -7   96.49    8.70
   9   0  -8    7.30    3.30
   8   0  -8   59.49    6.50
   7   0  -8   37.30    5.30
   6   0  -8    0.50    1.90
   5   0  -8   28.90    3.10
   5   0  -8   30.70    4.10
   4   0  -8   43.30    3.20
   4   0  -8   39.20    4.00
   3   0  -8    2.00    1.20
   3   0  -8   -0.50    1.10
   2   0  -8   22.90    2.70
   2   0  -8   18.60    2.40
   1   0  -8  108.39    4.40
   1   0  -8  105.09    4.70
   0   0  -8    8.40    1.50
   0   0  -8    6.20    1.60
   1   0   8   45.60    2.50
  -1   0  -8   46.50    3.40
  -2   0  -8  472.05   10.70
   2   0   8  488.05   10.40
  -2   0  -8  487.75   12.40
  -3   0  -8   33.90    3.70
  -3   0  -8   29.60    2.80
   3   0   8   29.90    2.40
  -4   0  -8   21.70    3.20
  -4   0  -8   33.20    3.10
   4   0   8   26.70    3.90
  -5   0  -8  238.18    9.40
  -5   0  -8  244.88    8.00
  -6   0  -8  354.46   11.30
  -6   0  -8  379.86   12.80
   9  -1  -8   27.20    5.30
   9   1  -8   18.00    4.50
   8  -1  -8   86.89    7.10
   8   1  -8   92.89    7.60
   7  -1  -8  173.58    8.80
   7   1  -8  164.68    9.20
   6  -1  -8   67.89    5.30
   6  -1  -8   68.89    4.60
   6   1  -8   72.19    5.90
   5  -1  -8  142.79    6.70
   5  -1  -8  141.89    6.20
   5   1  -8  136.89    7.30
   4  -1  -8   19.20    2.80
   4  -1  -8   24.10    3.10
   4   1  -8   21.10    3.20
   4   1  -8   21.10    2.40
   3  -1  -8   61.99    3.80
   3  -1  -8   71.29    4.20
   3   1  -8   64.19    4.40
   3   1  -8   67.89    3.60
   2  -1  -8  405.56   10.50
   2  -1  -8  380.36    9.20
   2   1  -8  405.56    9.90
   2   1  -8  383.96   10.90
   1  -1  -8  368.16    8.20
   1  -1  -8  378.36   10.00
   1   1  -8  387.56    9.90
   1   1  -8  370.46   10.30
   0  -1  -8  155.28    4.00
   0  -1  -8  160.58    6.00
   0   1  -8  159.98    6.10
  -1  -1  -8  179.98    6.50
  -1   1  -8  179.28    6.40
  -1   1  -8  176.58    4.70
  -1   1  -8  184.88    6.90
   2  -1   8  300.67    8.30
  -2  -1  -8  293.37    8.90
  -2  -1  -8  298.77    8.60
  -2   1  -8  299.87    9.50
  -3  -1  -8  571.84   13.90
   3  -1   8  559.64   13.00
  -3  -1  -8  561.04   13.30
  -3   1  -8  553.74   14.60
  -4  -1  -8   70.79    4.20
   4  -1   8   57.09    3.80
  -4  -1  -8   57.09    4.20
  -4   1  -8   57.89    5.40
  -5  -1  -8   12.30    2.40
   5  -1   8   14.60    2.60
  -5  -1  -8   11.10    2.60
  -5   1  -8   14.20    3.10
   6  -1   8    6.10    2.10
  -6  -1  -8    7.10    2.20
  -6   1  -8    3.50    2.40
  -7  -1  -8   93.99    5.90
  -8  -1  -8  171.98    8.60
   9  -2  -8    3.10    2.90
   9   2  -8    2.90    3.40
   8  -2  -8   57.49    6.20
   8   2  -8   53.29    7.00
   7  -2  -8   66.89    5.90
   7  -2  -8   53.49    5.60
   7   2  -8   63.49    6.90
   6  -2  -8  333.37   11.10
   6  -2  -8  322.67   10.80
   6   2  -8  312.47   12.40
   5  -2  -8  142.89    6.90
   5  -2  -8  156.28    6.80
   5   2  -8  151.08    8.10
   4  -2  -8   46.60    3.50
   4  -2  -8   53.59    4.90
   4   2  -8   51.09    5.40
   4   2  -8   41.80    2.90
   3  -2  -8  222.08    6.80
   3  -2  -8  220.48    7.90
   3   2  -8  219.48    6.80
   3   2  -8  234.68    9.10
   2  -2  -8  433.26   11.70
   2   2  -8  460.75   12.90
   2   2  -8  427.26   10.70
   1  -2  -8   60.49    4.00
   1   2  -8   57.99    3.70
   1   2  -8   60.79    4.40
   0  -2  -8  403.66   10.70
   0   2  -8  403.06   11.60
   0   2  -8  401.96   10.90
  -1  -2  -8  138.29    5.70
  -1   2  -8  151.48    6.40
  -1   2  -8  135.59    6.20
   2  -2   8   58.59    3.90
  -2  -2  -8   56.29    3.80
  -2  -2  -8   57.79    4.00
  -2   2  -8   57.19    4.40
   3  -2   8   78.69    4.70
  -3  -2  -8   84.09    4.80
  -3  -2  -8   78.99    4.60
  -3   2  -8   81.09    5.40
  -4  -2  -8   91.49    5.20
  -4  -2  -8   81.89    4.90
   4  -2   8   81.89    5.00
  -4   2  -8   85.19    6.00
   5  -2   8  106.19    5.80
  -5  -2  -8   94.99    5.60
  -5   2  -8  105.09    6.90
  -6  -2  -8   63.79    5.80
   6  -2   8   59.59    4.90
  -7  -2  -8    5.30    2.20
   7  -2   8    5.40    2.50
   8  -2   8    7.30    3.10
  -8  -2  -8   13.70    3.30
   8  -3  -8   11.90    3.30
   8   3  -8    8.30    3.70
   7  -3  -8   26.10    4.10
   7  -3  -8   25.90    4.30
   7   3  -8   24.70    4.90
   6  -3  -8   35.90    4.20
   6  -3  -8   22.00    3.60
   6   3  -8   34.30    5.30
   5  -3  -8   37.30    3.90
   5  -3  -8   31.00    4.00
   5   3  -8   34.70    5.20
   4  -3  -8  146.19    7.10
   4   3  -8  154.88    8.40
   3  -3  -8  174.98    7.70
   3   3  -8  187.48    6.40
   3   3  -8  194.68    9.00
   2  -3  -8    3.80    1.80
   2   3  -8    1.70    1.20
   2   3  -8    1.30    1.80
   1  -3  -8   13.30    2.60
   1   3  -8   10.20    2.60
   1   3  -8   14.30    2.50
   0  -3  -8  296.17    9.30
   0   3  -8  309.17    9.80
   0   3  -8  300.77   10.70
  -1  -3  -8  234.68    8.00
  -1   3  -8  232.18    9.20
  -1   3  -8  244.48    8.90
  -2  -3  -8   39.80    3.90
  -2  -3  -8   34.80    3.80
   2  -3   8   34.80    4.00
  -2   3  -8   55.09    5.30
  -3  -3  -8  432.66   12.60
  -3  -3  -8  412.46   11.30
   3  -3   8  409.86   12.40
  -3   3  -8  428.16   13.60
  -4  -3  -8    8.80    2.40
   4  -3   8    7.70    2.40
  -4  -3  -8   10.50    2.40
  -4   3  -8    9.70    2.90
  -5  -3  -8    2.00    1.70
   5  -3   8    2.50    2.10
  -6  -3  -8   20.30    3.60
   6  -3   8   14.00    3.30
   7  -3   8   -0.20    1.80
  -7  -3  -8    0.10    1.70
   8  -4  -8  107.59    7.70
   8   4  -8   88.09    9.40
   7  -4  -8   85.59    7.50
   7   4  -8   88.99    8.80
   6  -4  -8   -1.30    2.00
   6   4  -8    1.30    2.90
   5  -4  -8   69.89    6.30
   5   4  -8   68.09    7.20
   4  -4  -8  134.29    7.10
   4   4  -8  122.49    8.20
   3  -4  -8  663.53   17.10
   3   4  -8  637.04   18.90
   2  -4  -8  498.85   14.30
   2   4  -8  505.15   16.00
   2   4  -8  536.85   13.30
   1  -4  -8  184.68    7.70
   1   4  -8  163.38    7.10
   1   4  -8  191.38    9.20
   0  -4  -8  140.09    6.50
   0   4  -8  150.18    8.10
   0   4  -8  140.89    6.80
  -1  -4  -8   39.00    3.90
  -1   4  -8   41.60    5.00
  -1   4  -8   34.90    4.20
  -2  -4  -8   19.10    3.30
  -2  -4  -8   17.60    2.80
   2  -4   8   20.30    3.60
  -2   4  -8   15.70    3.20
   3  -4   8   93.29    6.00
  -3  -4  -8  104.89    6.30
  -3  -4  -8  107.29    5.40
  -4  -4  -8   86.49    5.90
   4  -4   8   88.19    6.20
   5  -4   8    6.60    2.70
  -5  -4  -8    3.10    2.20
  -6  -4  -8   16.80    3.60
   6  -4   8   10.90    3.10
   7  -4   8   40.10    5.80
  -7  -4  -8   31.10    4.80
   7  -5  -8  100.59    7.80
   7   5  -8  109.09   10.70
   6  -5  -8   71.99    7.10
   6   5  -8   64.39    7.80
   5  -5  -8  204.58    9.80
   5   5  -8  191.68   11.10
   4  -5  -8   42.80    5.10
   4   5  -8   54.19    7.10
   3  -5  -8   48.70    5.50
   3   5  -8   40.90    6.10
   2  -5  -8  461.15   14.10
   2   5  -8  461.65   16.40
   1  -5  -8  163.88    7.70
   1   5  -8  148.09    8.80
   0  -5  -8   43.30    4.70
   0   5  -8   46.20    6.10
  -1  -5  -8    7.70    2.30
  -1   5  -8    7.90    3.00
  -2  -5  -8    8.00    2.30
  -2  -5  -8    5.60    2.40
   2  -5   8    4.50    2.30
  -3  -5  -8    3.80    2.10
   3  -5   8    0.10    2.00
   4  -5   8  114.19    7.40
  -4  -5  -8  106.89    6.80
  -5  -5  -8   48.40    5.60
   5  -5   8   54.49    6.30
  -6  -5  -8   69.59    7.00
   6  -5   8   67.99    6.90
   6  -6  -8  143.99    9.20
   6   6  -8  148.49   10.80
   5  -6  -8   46.70    5.80
   5   6  -8   62.49    8.00
   4  -6  -8   19.50    4.20
   4   6  -8   23.60    5.10
   3  -6  -8    5.50    2.80
   3   6  -8    7.30    3.30
   2  -6  -8    1.40    2.30
   2   6  -8    1.70    3.00
   1  -6  -8   20.70    3.60
   1   6  -8   13.90    4.30
   0  -6  -8   94.29    6.20
   0   6  -8   77.69    8.00
  -1  -6  -8   83.59    5.70
  -1   6  -8   99.89    9.20
   2  -6   8   58.29    6.60
  -2  -6  -8   54.39    6.10
   3  -6   8    1.50    2.30
  -3  -6  -8    4.80    2.50
   4  -6   8   62.19    7.00
  -4  -6  -8   83.79    7.70
   5  -6   8   56.39    6.80
  -5  -6  -8   68.29    7.30
   4  -7  -8   40.00    5.90
   4   7  -8   58.19    8.20
   3  -7  -8   23.40    4.40
   3   7  -8   25.80    5.40
   2  -7  -8   21.60    4.30
   2   7  -8    9.80    4.00
   1  -7  -8    6.80    2.90
   1   7  -8   11.10    4.10
   0  -7  -8   17.30    3.50
   0   7  -8   17.70    4.40
   2  -7   8   92.29    7.60
  -2  -7  -8   82.99    7.80
   3  -7   8   35.20    5.90
  -3  -7  -8   27.50    4.70
   9   0  -9   23.00    5.20
   8   0  -9   13.30    4.10
   7   0  -9   35.00    5.20
   6   0  -9   75.79    5.90
   5   0  -9  371.66   10.30
   5   0  -9  360.16   11.90
   4   0  -9    3.80    1.50
   4   0  -9    0.90    1.60
   3   0  -9  135.29    6.10
   3   0  -9  149.49    5.90
   2   0  -9    1.20    1.20
   2   0  -9   -0.80    1.10
   1   0  -9   90.29    4.60
   1   0  -9   82.69    4.10
   0   0  -9   35.90    2.70
   0   0  -9   25.00    2.80
  -1   0  -9   12.70    2.30
   1   0   9   16.60    2.80
  -2   0  -9    0.90    0.90
  -2   0  -9    1.10    1.40
  -3   0  -9  177.98    6.00
  -3   0  -9  161.58    7.30
  -4   0  -9   39.10    4.30
  -5   0  -9    1.60    1.90
  -6   0  -9   78.69    6.10
   9  -1  -9   23.40    5.20
   9   1  -9   27.30    5.80
   8  -1  -9   -0.90    2.60
   8   1  -9   -0.10    2.50
   7  -1  -9  143.99    8.30
   7   1  -9  147.49    9.00
   6  -1  -9  259.07   10.20
   6  -1  -9  246.88    8.90
   6   1  -9  253.07   10.90
   5  -1  -9   83.79    5.10
   5  -1  -9   88.99    5.60
   5   1  -9   84.39    6.00
   4  -1  -9  392.96   11.20
   4  -1  -9  401.66   11.30
   4   1  -9  369.26   12.10
   4   1  -9  392.56   10.20
   3  -1  -9   25.80    3.20
   3  -1  -9   26.20    3.00
   3   1  -9   19.80    3.10
   3   1  -9   25.70    2.90
   2  -1  -9  113.19    5.30
   2  -1  -9  116.49    4.60
   2   1  -9  115.99    5.10
   2   1  -9  108.39    5.60
   1  -1  -9   52.99    3.70
   1   1  -9   54.49    3.90
   1   1  -9   69.69    4.00
   0  -1  -9  332.27    9.60
   0   1  -9  324.97    9.60
   0   1  -9  331.07    9.70
  -1  -1  -9   95.69    4.90
  -1   1  -9   86.69    5.00
  -2  -1  -9   51.89    3.90
   2  -1   9   56.09    3.50
  -2  -1  -9   49.30    3.50
  -2   1  -9   39.50    4.00
  -3  -1  -9  217.98    7.50
   3  -1   9  218.18    7.30
  -3  -1  -9  229.78    8.30
  -3   1  -9  218.28    8.70
   4  -1   9   48.40    3.60
  -4  -1  -9   39.10    3.80
  -4  -1  -9   39.90    4.30
  -4   1  -9   51.99    5.50
  -5  -1  -9  198.28    7.70
  -5  -1  -9  201.98    8.60
  -5   1  -9  187.48    8.90
  -6  -1  -9  165.88    7.40
  -6   1  -9  151.38    8.60
   8  -2  -9   22.80    4.50
   8   2  -9   17.00    4.70
   7  -2  -9    3.70    2.40
   7  -2  -9    3.60    2.20
   7   2  -9    2.40    2.80
   6  -2  -9   44.80    4.70
   6  -2  -9   37.20    4.50
   6   2  -9   58.89    6.80
   5  -2  -9  377.96   11.80
   5  -2  -9  369.26   11.30
   5   2  -9  360.36   13.20
   4  -2  -9   11.70    2.70
   4  -2  -9    9.00    2.50
   4   2  -9    8.40    1.80
   4   2  -9    4.60    2.40
   3  -2  -9  153.28    6.80
   3   2  -9  149.88    7.60
   3   2  -9  138.19    5.70
   2  -2  -9   12.60    2.50
   2   2  -9   16.00    3.00
   2   2  -9   14.60    2.30
   1  -2  -9  127.39    5.90
   1   2  -9  140.09    6.80
   1   2  -9  126.59    5.70
   0  -2  -9   17.70    2.70
   0   2  -9   16.60    3.00
   0   2  -9   18.30    2.80
  -1  -2  -9  158.28    6.50
  -1   2  -9  153.98    6.90
  -1   2  -9  158.58    6.90
   2  -2   9   10.40    2.20
  -2  -2  -9   11.70    2.40
  -2  -2  -9   12.00    2.30
  -2   2  -9   11.40    2.60
  -3  -2  -9  144.69    6.50
  -3  -2  -9  138.49    6.40
   3  -2   9  155.18    6.60
  -3   2  -9  134.99    7.20
   4  -2   9  663.33   16.40
  -4  -2  -9  668.03   16.50
  -4  -2  -9  646.74   16.30
  -4   2  -9  669.33   18.30
   5  -2   9   66.89    4.80
  -5  -2  -9   74.19    5.10
  -5   2  -9   70.99    6.70
   6  -2   9   90.89    6.00
  -6  -2  -9   78.19    5.70
  -7  -2  -9   64.19    6.20
   8  -3  -9   41.30    7.60
   8   3  -9   52.99    7.80
   7  -3  -9   79.29    6.10
   7   3  -9   86.99    8.60
   6  -3  -9   21.60    3.80
   6   3  -9   26.80    5.20
   5  -3  -9  213.88    9.10
   5   3  -9  208.68   10.30
   4  -3  -9  138.09    7.10
   4   3  -9  148.69    8.40
   3  -3  -9  129.79    6.60
   3   3  -9  127.39    7.40
   3   3  -9  126.19    5.50
   2  -3  -9   75.19    5.00
   2   3  -9   80.19    6.00
   2   3  -9   77.09    4.50
   1  -3  -9  124.79    6.20
   1   3  -9  111.99    6.80
   1   3  -9  107.49    5.50
   0  -3  -9    8.40    2.20
   0   3  -9   16.30    2.80
   0   3  -9   18.90    3.60
  -1  -3  -9   70.89    4.60
  -1   3  -9   71.39    5.00
  -1   3  -9   73.49    5.40
  -2  -3  -9   42.30    4.20
  -2  -3  -9   42.00    4.50
   2  -3   9   40.30    4.20
  -2   3  -9   37.70    4.50
  -3  -3  -9    5.70    2.00
   3  -3   9    6.10    2.30
  -3  -3  -9    8.50    2.10
  -3   3  -9    9.30    2.80
  -4  -3  -9  167.78    7.40
  -4  -3  -9  165.98    7.80
   4  -3   9  187.68    8.20
  -4   3  -9  184.78    9.30
  -5  -3  -9   61.39    5.60
   5  -3   9   71.09    5.50
   6  -3   9   43.60    5.10
  -6  -3  -9   39.60    4.80
   7  -3   9   29.10    4.60
  -7  -3  -9   23.00    3.90
   8  -4  -9   23.30    4.60
   8   4  -9   17.30    5.80
   7  -4  -9    5.10    2.80
   7   4  -9    6.30    3.70
   6  -4  -9   85.79    6.50
   6   4  -9   80.49    8.60
   5  -4  -9    7.70    2.70
   5   4  -9    6.00    3.50
   4  -4  -9  184.58    8.70
   4   4  -9  168.38    9.50
   3  -4  -9   42.00    4.70
   3   4  -9   57.69    6.40
   2  -4  -9   92.49    5.90
   2   4  -9   99.89    5.40
   2   4  -9   94.49    7.00
   1  -4  -9  137.29    6.90
   1   4  -9  141.29    8.30
   1   4  -9  135.19    6.60
   0  -4  -9   15.40    2.90
   0   4  -9   14.30    3.00
   0   4  -9   11.00    3.00
  -1  -4  -9  286.37    9.70
  -1   4  -9  287.17   11.40
  -1   4  -9  278.77   10.70
  -2  -4  -9   37.30    4.30
   2  -4   9   33.30    4.40
  -2  -4  -9   35.40    4.00
  -2   4  -9   35.30    4.70
   3  -4   9    6.80    2.50
  -3  -4  -9    9.20    2.40
  -3  -4  -9    4.60    2.20
  -4  -4  -9   39.40    4.60
   4  -4   9   25.70    4.10
  -5  -4  -9    8.40    2.80
   5  -4   9    8.50    2.90
  -6  -4  -9   17.50    3.70
   6  -4   9   15.10    3.60
   7  -5  -9   59.59    6.40
   7   5  -9   46.70    7.50
   6  -5  -9  174.08    9.40
   6   5  -9  163.08   11.10
   5  -5  -9   29.70    4.90
   5   5  -9   21.70    4.80
   4  -5  -9   13.90    3.40
   4   5  -9    7.80    3.60
   3  -5  -9   25.50    4.40
   3   5  -9   23.20    4.80
   2  -5  -9    1.70    2.10
   2   5  -9    1.30    2.70
   1  -5  -9   19.90    3.60
   1   5  -9   18.60    3.20
   1   5  -9   15.80    4.10
   0  -5  -9  162.68    7.80
   0   5  -9  154.78    9.30
  -1  -5  -9  126.19    6.70
  -1   5  -9  111.89    7.90
  -2  -5  -9   34.10    4.60
   2  -5   9   42.70    5.30
  -2  -5  -9   43.20    4.40
   3  -5   9   37.50    4.90
  -3  -5  -9   33.20    4.60
  -4  -5  -9    8.40    2.80
   4  -5   9    6.00    2.80
   5  -5   9   55.49    6.20
  -5  -5  -9   58.99    6.40
   6  -6  -9   43.70    6.40
   6   6  -9   57.69   11.50
   5  -6  -9  163.28    9.50
   5   6  -9  149.39   11.00
   4  -6  -9   83.59    7.40
   4   6  -9  100.19   10.10
   3  -6  -9  137.79    8.40
   3   6  -9  135.09   10.00
   2  -6  -9    8.30    3.10
   2   6  -9    6.00    3.20
   1  -6  -9  141.89    8.00
   1   6  -9  136.19    9.70
   0  -6  -9   11.60    3.10
   0   6  -9   15.60    4.60
  -1  -6  -9    2.40    2.00
  -1   6  -9    8.00    3.80
  -2  -6  -9   47.00    5.70
   2  -6   9   52.39    6.30
  -3  -6  -9   36.30    5.10
   3  -6   9   31.10    5.20
  -4  -6  -9   56.69    6.40
   4  -6   9   44.30    6.00
   4  -7  -9  131.99    9.20
   4   7  -9  106.69   10.80
   3  -7  -9    6.70    3.20
   3   7  -9   11.20    4.40
   2  -7  -9   17.90    4.00
   2   7  -9   11.30    4.60
   1  -7  -9   72.19    7.00
   1   7  -9   92.39   10.20
   0  -7  -9   22.60    4.10
   0   7  -9   18.90    5.20
  -2  -7  -9   28.20    5.00
   2  -7   9   39.80    6.20
   8   0 -10    2.50    3.20
   7   0 -10  187.78    9.90
   6   0 -10   45.60    5.40
   5   0 -10   45.00    4.90
   5   0 -10   45.70    4.20
   4   0 -10   55.29    4.50
   4   0 -10   55.69    4.00
   3   0 -10    4.40    1.80
   3   0 -10    1.30    1.40
   2   0 -10   38.40    3.80
   2   0 -10   47.10    4.20
   1   0 -10   42.70    4.10
   1   0 -10   28.20    3.30
   0   0 -10  101.79    5.30
  -1   0 -10 2672.63   44.40
  -1   0 -10 2598.64   46.90
  -2   0 -10  758.62   18.20
  -3   0 -10  429.16   13.00
  -4   0 -10  168.68    8.10
  -5   0 -10   10.30    2.90
  -6   0 -10    0.20    2.00
   8  -1 -10   14.40    4.00
   8   1 -10   13.00    4.30
   7  -1 -10   53.49    6.10
   7   1 -10   59.49    6.90
   6  -1 -10  112.99    7.00
   6  -1 -10  129.69    6.60
   6   1 -10  131.69    8.10
   5  -1 -10    1.20    1.80
   5  -1 -10    3.10    1.80
   5   1 -10    1.00    2.20
   4  -1 -10  494.55   13.30
   4  -1 -10  510.65   13.50
   4   1 -10  500.75   12.50
   4   1 -10  484.35   14.50
   3  -1 -10   11.10    2.50
   3   1 -10   11.20    2.60
   3   1 -10   16.10    2.50
   2  -1 -10    3.60    1.70
   2   1 -10   11.10    2.50
   2   1 -10    5.70    1.80
   1  -1 -10  338.67   10.20
   1   1 -10  327.27    9.90
   1   1 -10  328.27   10.20
   0  -1 -10  469.25   12.50
   0   1 -10  447.76   12.30
   0   1 -10  444.46   12.00
  -1  -1 -10  297.57    9.70
  -1   1 -10  292.47    9.90
  -2  -1 -10  715.63   17.20
  -2  -1 -10  715.13   16.20
  -2   1 -10  712.23   17.80
  -3  -1 -10  234.68    8.10
  -3  -1 -10  238.88    9.10
  -3   1 -10  251.67    9.80
  -4  -1 -10   28.80    4.10
  -4  -1 -10   26.10    3.30
  -4   1 -10   23.20    4.00
  -5  -1 -10   10.60    3.70
  -5  -1 -10   13.20    3.10
  -5   1 -10   11.10    3.20
  -6   1 -10    5.40    2.80
   8  -2 -10   31.30    5.20
   8   2 -10   36.20    6.10
   7  -2 -10   45.40    5.20
   7  -2 -10   52.09    8.20
   7   2 -10   54.29    7.10
   6  -2 -10   86.29    6.00
   6   2 -10   62.49    6.80
   5  -2 -10   55.69    5.20
   5   2 -10   50.29    6.10
   4  -2 -10  186.98    8.10
   4   2 -10  181.38    7.80
   4   2 -10  182.18    9.00
   3  -2 -10   95.09    5.70
   3   2 -10   95.69    6.30
   3   2 -10   93.69    4.90
   2  -2 -10  180.28    7.50
   2   2 -10  182.48    8.30
   2   2 -10  178.88    7.00
   1  -2 -10  393.56   11.50
   1   2 -10  381.66   12.10
   1   2 -10  373.36   11.10
   0  -2 -10   42.20    4.10
   0   2 -10   49.40    4.80
   0   2 -10   43.60    4.30
  -1  -2 -10   56.19    4.40
  -1   2 -10   56.99    4.50
  -1   2 -10   58.09    4.50
   2  -2  10   17.60    2.80
  -2  -2 -10   13.60    2.60
  -2  -2 -10   15.30    2.70
  -2   2 -10   20.10    3.50
  -3  -2 -10   65.39    4.60
  -3  -2 -10   71.09    5.00
   3  -2  10   70.69    4.70
  -3   2 -10   55.99    5.60
  -4  -2 -10    7.20    2.40
   4  -2  10   11.00    2.60
  -4  -2 -10    7.70    2.20
  -4   2 -10    8.20    2.90
  -5  -2 -10   38.60    4.30
  -5   2 -10   31.30    5.00
  -6  -2 -10    8.50    2.60
  -7  -2 -10   10.40    2.90
   8   3 -10   75.29    9.10
   7  -3 -10   32.60    4.80
   7   3 -10   32.30    5.90
   6  -3 -10   42.90    5.20
   6   3 -10   41.20    6.00
   5  -3 -10  119.99    7.20
   5   3 -10  119.79    8.40
   4  -3 -10  119.49    6.90
   4   3 -10  118.39    8.00
   3  -3 -10  229.88    9.20
   3   3 -10  225.68   10.40
   3   3 -10  237.48    8.20
   2  -3 -10  116.29    6.40
   2   3 -10  130.59    6.10
   2   3 -10  142.19    7.90
   1  -3 -10    9.00    2.50
   1   3 -10    2.20    2.10
   1   3 -10    5.10    1.80
   0  -3 -10   30.60    4.00
   0   3 -10   22.50    3.40
   0   3 -10   23.40    3.80
  -1  -3 -10   44.50    4.50
  -1   3 -10   35.70    4.50
  -1   3 -10   31.80    4.30
  -2  -3 -10  110.99    6.20
  -2  -3 -10  116.99    6.10
   2  -3  10  108.99    6.10
  -2   3 -10  119.59    7.00
  -3  -3 -10    4.30    2.00
   3  -3  10    1.90    1.80
  -3  -3 -10    3.70    2.00
  -3   3 -10    8.30    2.90
  -4  -3 -10   84.89    5.60
   4  -3  10   78.89    5.60
  -4  -3 -10   79.29    5.60
  -4   3 -10   76.69    7.30
   5  -3  10   99.69    6.50
  -5  -3 -10   81.39    5.90
  -6  -3 -10   42.40    5.10
   6  -3  10   47.10    5.50
   7  -4 -10    6.40    3.30
   7   4 -10   12.00    4.50
   6  -4 -10   51.49    6.00
   6   4 -10   50.49    7.30
   5  -4 -10   28.10    4.60
   5   4 -10   18.20    4.50
   4  -4 -10   42.80    5.20
   4   4 -10   49.00    6.80
   3  -4 -10  138.79    7.70
   3   4 -10  158.18    9.40
   2  -4 -10   39.00    4.80
   2   4 -10   32.20    5.10
   2   4 -10   36.30    4.10
   1  -4 -10   84.29    5.80
   1   4 -10   89.09    5.70
   1   4 -10  101.39    7.20
   0  -4 -10   37.30    4.40
   0   4 -10   33.90    4.90
   0   4 -10   46.10    5.10
  -1  -4 -10  137.39    6.90
  -1   4 -10  127.19    7.80
  -1   4 -10  134.89    7.60
  -2  -4 -10   16.10    3.00
  -2  -4 -10   13.70    2.90
   2  -4  10   15.40    3.30
  -2   4 -10   19.90    4.00
  -3  -4 -10   66.49    5.10
  -3  -4 -10   64.79    6.00
   3  -4  10   75.79    6.00
  -3   4 -10   76.69    7.30
   4  -4  10   13.90    3.40
  -4  -4 -10   11.60    2.90
   5  -4  10   63.19    6.60
  -5  -4 -10   53.19    5.70
   6  -4  10   46.30    5.60
  -6  -4 -10   53.29    6.20
   6  -5 -10   43.10    6.00
   6   5 -10   50.69    7.90
   5  -5 -10   38.00    5.30
   5   5 -10   39.90    6.40
   4  -5 -10   14.30    3.50
   4   5 -10   11.80    3.90
   3  -5 -10  240.48   10.80
   3   5 -10  257.17   12.70
   2  -5 -10   83.99    6.40
   2   5 -10   79.29    8.20
   1  -5 -10    1.50    2.00
   1   5 -10    3.60    2.10
   1   5 -10    1.70    2.80
   0  -5 -10   29.80    4.40
   0   5 -10   33.30    4.70
   0   5 -10   28.90    4.90
  -1  -5 -10   12.20    3.10
  -1   5 -10   15.70    4.00
  -2  -5 -10   10.90    2.90
  -2  -5 -10   10.60    2.80
   2  -5  10    3.80    2.40
   3  -5  10   50.59    5.90
  -3  -5 -10   49.70    5.90
   4  -5  10   34.00    5.10
  -4  -5 -10   27.70    4.50
  -5  -5 -10    6.80    2.80
   5  -5  10    9.60    3.50
   5  -6 -10    1.70    2.70
   5   6 -10    0.30    3.60
   4  -6 -10    2.20    2.90
   4   6 -10    2.00    3.00
   3  -6 -10    6.10    3.20
   3   6 -10    7.10    3.90
   2  -6 -10   36.20    5.30
   2   6 -10   34.00    6.20
   1  -6 -10   47.80    5.70
   1   6 -10   43.80    6.60
   0  -6 -10   44.10    5.40
   0   6 -10   40.30    6.50
  -1  -6 -10    8.60    2.90
  -1   6 -10   19.80    4.80
  -2  -6 -10   22.40    4.30
   2  -6  10   18.00    4.30
   3  -6  10   12.50    3.80
  -3  -6 -10    7.80    3.00
   3  -7 -10  146.19    9.50
   3   7 -10  164.08   13.60
   2  -7 -10   48.50    6.20
   2   7 -10   59.49    8.50
   1  -7 -10   20.40    4.20
   1   7 -10   22.40    5.90
   0  -7 -10   64.99    6.50
   0   7 -10   70.89    8.60
   8   0 -11   43.40    6.40
   7   0 -11    0.10    2.50
   6   0 -11    5.00    2.80
   5   0 -11  241.38    8.60
   5   0 -11  226.08    9.80
   4   0 -11   13.80    3.00
   4   0 -11   21.30    3.20
   3   0 -11  141.39   10.20
   3   0 -11  142.39    6.50
   2   0 -11    7.40    2.20
   1   0 -11  268.87    9.20
   0   0 -11  660.73   16.40
  -1   0 -11   60.49    5.50
  -2   0 -11  181.78    8.10
  -3   0 -11    4.90    2.30
  -4   0 -11   15.40    3.50
  -5   0 -11  103.19    7.20
  -6   0 -11   -0.80    2.20
   8  -1 -11   11.90    4.20
   8   1 -11   20.20    4.90
   7  -1 -11    5.60    3.10
   7   1 -11   11.00    3.80
   6  -1 -11   90.79    5.90
   6   1 -11   94.59    7.50
   5  -1 -11   11.00    2.70
   5   1 -11    5.60    2.80
   4  -1 -11  198.98    8.10
   4   1 -11  192.08    8.90
   4   1 -11  207.78    7.60
   3  -1 -11  450.25   12.90
   3   1 -11  446.06   13.60
   3   1 -11  457.35   12.30
   2  -1 -11  348.17   10.80
   2   1 -11  341.97   11.10
   2   1 -11  332.67   10.40
   1  -1 -11  250.87    8.90
   1   1 -11  251.07    8.90
   1   1 -11  242.38    8.80
   0  -1 -11  311.17   10.30
   0   1 -11  321.07   10.40
  -1  -1 -11   34.40    4.00
  -1   1 -11   23.50    3.40
  -2  -1 -11  550.24   15.10
  -2  -1 -11  555.04   13.80
  -2   1 -11  540.75   15.40
  -3  -1 -11  184.38    8.30
  -3   1 -11  189.28    8.80
  -4  -1 -11  102.89    6.60
  -4   1 -11  101.79    7.00
  -5  -1 -11   36.60    4.70
  -5   1 -11   43.60    5.70
  -6   1 -11   31.30    5.00
   8   2 -11   31.50    6.00
   7  -2 -11   16.30    3.90
   7   2 -11   15.60    4.60
   6  -2 -11  100.29    6.60
   6   2 -11  113.39    8.30
   5  -2 -11    4.20    2.20
   5   2 -11    5.00    3.00
   4  -2 -11  157.68    7.70
   4   2 -11  152.98    8.60
   3  -2 -11   75.09    5.30
   3   2 -11   65.59    6.20
   3   2 -11   68.99    4.50
   2  -2 -11  676.23   17.10
   2   2 -11  672.33   16.40
   2   2 -11  698.53   18.40
   1  -2 -11  445.76   12.70
   1   2 -11  404.86   12.20
   1   2 -11  422.46   13.20
   0  -2 -11  112.19    6.20
   0   2 -11  123.19    6.40
   0   2 -11  114.89    6.40
  -1  -2 -11   -0.20    1.60
  -1   2 -11    0.00    1.40
  -2  -2 -11   35.60    4.20
   2  -2  11   31.60    3.90
  -2  -2 -11   38.30    4.10
  -2   2 -11   40.90    5.00
  -3  -2 -11   86.79    5.40
  -3  -2 -11   72.29    5.40
  -3   2 -11   88.39    6.60
  -4  -2 -11   82.69    5.90
  -4  -2 -11   83.09    5.50
  -4   2 -11  101.59    8.70
  -5  -2 -11   76.09    5.40
  -5   2 -11   77.59    7.80
  -6   2 -11   18.00    4.30
   7  -3 -11   48.80    5.80
   7   3 -11   54.49    7.40
   6  -3 -11    5.10    2.70
   6   3 -11    1.80    3.20
   5  -3 -11   20.90    3.80
   5   3 -11   15.90    4.50
   4  -3 -11   60.29    5.90
   4   3 -11   72.29    7.60
   3  -3 -11    4.20    2.20
   3   3 -11    0.60    2.20
   3   3 -11    3.20    1.70
   2  -3 -11    3.30    1.90
   2   3 -11    1.20    2.20
   2   3 -11    3.40    1.70
   1  -3 -11    5.00    2.10
   1   3 -11    5.80    2.10
   1   3 -11    7.00    2.80
   0  -3 -11   37.50    4.30
   0   3 -11   35.30    4.30
   0   3 -11   26.70    4.20
  -1  -3 -11  114.39    6.40
  -1   3 -11  109.99    6.80
  -1   3 -11  104.29    6.70
  -2  -3 -11   13.50    3.00
   2  -3  11   17.50    3.20
  -2  -3 -11   23.70    3.70
  -2   3 -11   24.90    4.30
   3  -3  11   43.60    4.80
  -3  -3 -11   49.99    5.20
  -3  -3 -11   49.10    5.20
  -3   3 -11   44.40    5.80
  -4  -3 -11   32.90    4.30
   4  -3  11   27.60    4.10
  -4  -3 -11   36.70    4.60
  -4   3 -11   39.30    5.70
  -5  -3 -11   13.70    3.10
  -5   3 -11   13.30    3.90
  -6  -3 -11   13.30    3.30
   7  -4 -11   38.80    5.60
   7   4 -11   35.70    7.20
   6  -4 -11    1.80    2.50
   6   4 -11    5.50    3.80
   5  -4 -11   14.80    3.70
   5   4 -11   14.40    4.50
   4  -4 -11   63.39    6.60
   4   4 -11   58.69    7.40
   3  -4 -11  120.39    7.30
   3   4 -11  103.29    8.00
   2  -4 -11   22.60    4.10
   2   4 -11   25.20    3.60
   2   4 -11   20.50    4.40
   1  -4 -11   32.00    4.30
   1   4 -11   42.30    4.80
   1   4 -11   39.30    5.60
   0  -4 -11  137.79    7.30
   0   4 -11  127.99    7.40
   0   4 -11  134.19    8.40
  -1  -4 -11   54.49    5.40
  -1   4 -11   59.09    6.30
  -1   4 -11   54.99    6.10
  -2  -4 -11   50.19    5.20
  -2  -4 -11   50.79    5.60
   2  -4  11   71.49    5.70
  -2   4 -11   66.59    6.80
  -3  -4 -11    8.80    2.70
   3  -4  11    8.40    2.90
  -3  -4 -11   13.30    3.00
  -3   4 -11   12.10    3.60
   4  -4  11   55.99    6.00
  -4  -4 -11   50.29    5.70
  -5  -4 -11   32.70    4.90
   5  -4  11   29.00    4.70
   6  -5 -11   65.49    7.20
   6   5 -11   50.89    7.80
   5  -5 -11   87.09    8.30
   5   5 -11   85.49    9.30
   4  -5 -11   55.19    6.20
   4   5 -11   42.40    6.60
   3  -5 -11  130.69    8.40
   3   5 -11  128.49    9.60
   2  -5 -11  102.99    7.20
   2   5 -11   89.09    9.20
   1  -5 -11    4.40    2.70
   1   5 -11    2.20    2.80
   1   5 -11    5.00    2.40
   0  -5 -11   22.10    3.90
   0   5 -11   30.00    5.50
   0   5 -11   20.80    4.10
  -1  -5 -11   29.20    4.20
  -1   5 -11   27.90    4.50
  -1   5 -11   32.20    5.50
   2  -5  11   54.19    6.10
  -2  -5 -11   51.49    5.90
  -2  -5 -11   55.49    5.50
   3  -5  11   59.69    6.50
  -3  -5 -11   59.49    6.40
  -4  -5 -11    4.50    2.40
   4  -5  11    2.60    2.60
   4  -6 -11   63.09    7.20
   4   6 -11   57.89    8.30
   3  -6 -11   59.79    6.70
   3   6 -11   56.59    7.70
   2  -6 -11   15.00    4.00
   2   6 -11   23.60    5.50
   1  -6 -11   56.99    6.20
   1   6 -11   45.10    7.20
   0  -6 -11  103.79    7.20
   0   6 -11  107.59    8.90
  -1  -6 -11   87.19    6.50
   2  -6  11   19.30    4.50
  -2  -6 -11   18.60    4.10
   3  -6  11   30.50    5.30
  -3  -6 -11   25.20    5.10
   8   0 -12   78.99    8.50
   7   0 -12   15.50    4.20
   5   0 -12  224.48    8.70
   4   0 -12  303.37   10.20
   3   0 -12   12.10    2.60
   2   0 -12    2.20    1.70
   1   0 -12   53.89    5.20
   0   0 -12  240.48    9.20
  -1   0 -12  107.99    6.40
  -2   0 -12  124.19    7.10
  -3   0 -12    1.00    2.10
  -4   0 -12   78.79    6.30
  -5   0 -12  107.79    7.60
  -6   0 -12    2.10    2.50
   8   1 -12    6.00    4.00
   7   1 -12   62.69    7.60
   6  -1 -12  120.79    6.90
   6   1 -12  135.99    8.70
   5  -1 -12  112.09    6.60
   5   1 -12  111.39    7.60
   4  -1 -12   29.10    4.10
   4   1 -12   25.30    4.20
   4   1 -12   28.30    3.70
   3  -1 -12   62.69    5.60
   3   1 -12   62.09    5.90
   3   1 -12   60.19    4.60
   2  -1 -12  165.58    7.50
   2   1 -12  154.08    7.10
   1  -1 -12  156.48    7.40
   1   1 -12  166.28    7.60
   0  -1 -12   47.00    4.80
   0   1 -12   53.59    5.20
  -1  -1 -12  123.79    6.80
  -1   1 -12  133.99    7.10
  -2  -1 -12   40.30    4.60
  -2   1 -12   41.10    4.90
  -3  -1 -12   90.09    6.40
  -3   1 -12   86.59    6.40
  -4  -1 -12  141.39    7.90
  -4   1 -12  128.09    8.30
  -5  -1 -12   36.70    5.10
  -5   1 -12   37.50    5.50
  -6   1 -12  129.19    9.20
   7   2 -12   58.89    7.40
   6  -2 -12   10.90    3.10
   6   2 -12    9.70    3.80
   5  -2 -12   13.50    3.10
   4  -2 -12   34.50    4.60
   4   2 -12   33.00    5.10
   3  -2 -12  383.66   12.50
   3   2 -12  372.16   11.40
   3   2 -12  359.56   13.20
   2  -2 -12   78.39    5.50
   2   2 -12   79.29    5.30
   2   2 -12   84.89    6.30
   1  -2 -12   70.99    5.20
   1   2 -12   61.49    5.90
   1   2 -12   65.69    5.80
   0  -2 -12   10.70    2.80
   0   2 -12    9.00    2.50
   0   2 -12   11.60    2.90
  -1  -2 -12   44.20    5.00
  -1   2 -12   49.30    5.30
  -2  -2 -12    6.10    2.40
  -2  -2 -12    3.10    1.80
  -2   2 -12    7.10    2.60
  -3  -2 -12  122.99    6.40
  -3  -2 -12  120.99    7.00
  -3   2 -12  129.39    8.20
  -4  -2 -12   13.10    3.30
  -4   2 -12   18.20    4.20
  -5   2 -12   15.50    4.10
  -6   2 -12    0.00    2.60
   7  -3 -12   43.10    5.60
   7   3 -12   45.50    7.00
   6  -3 -12   25.90    4.60
   6   3 -12   19.40    4.90
   5  -3 -12   14.50    3.50
   5   3 -12   20.40    4.80
   4  -3 -12    8.10    2.90
   4   3 -12   14.00    4.10
   3  -3 -12   28.10    4.40
   3   3 -12   26.20    3.80
   3   3 -12   22.20    4.40
   2  -3 -12   74.39    5.70
   2   3 -12   73.29    7.40
   2   3 -12   78.09    5.40
   1  -3 -12  111.79    6.80
   1   3 -12  115.29    7.40
   1   3 -12  125.79    6.90
   0  -3 -12   63.49    6.00
   0   3 -12   72.19    6.80
   0   3 -12   68.19    5.40
  -1  -3 -12   71.69    5.50
  -1   3 -12   61.79    6.20
  -2  -3 -12   35.90    4.50
   2  -3  12   30.70    4.10
  -2  -3 -12   27.00    4.00
  -2   3 -12   47.40    6.00
  -3  -3 -12   32.90    4.30
  -3  -3 -12   39.10    4.80
  -3   3 -12   40.20    5.40
  -4  -3 -12   65.09    6.20
  -4  -3 -12   63.89    6.30
  -4   3 -12   65.59    7.30
  -5  -3 -12   92.49    6.50
  -5   3 -12   92.99    9.20
   6  -4 -12  136.99    8.90
   6   4 -12  123.49   10.20
   5  -4 -12   60.79    6.90
   5   4 -12   55.89    7.50
   4  -4 -12    8.60    3.10
   4   4 -12    0.60    3.00
   3  -4 -12   22.50    4.30
   3   4 -12   19.50    4.70
   2  -4 -12   83.19    6.50
   2   4 -12   70.99    5.50
   2   4 -12   80.59    8.10
   1  -4 -12   28.20    4.30
   1   4 -12   38.10    5.80
   1   4 -12   36.00    4.60
   0  -4 -12   74.49    6.60
   0   4 -12   94.79    6.60
   0   4 -12   73.59    7.30
  -1  -4 -12   56.59    5.80
  -1   4 -12   55.49    6.20
   2  -4  12   18.90    3.70
  -2  -4 -12   27.80    4.20
  -2  -4 -12   21.10    3.90
  -2   4 -12   27.60    4.90
   3  -4  12   21.60    4.10
  -3  -4 -12   21.30    3.90
  -3  -4 -12   22.30    4.00
  -3   4 -12   17.00    4.10
   4  -4  12    0.00    2.30
  -4  -4 -12    1.00    2.30
   5  -5 -12    9.60    3.80
   5   5 -12   17.20    5.60
   4  -5 -12   24.30    4.60
   4   5 -12   32.00    6.30
   3  -5 -12   80.79    7.90
   3   5 -12   99.89   10.10
   2  -5 -12    0.90    2.50
   2   5 -12   -0.40    2.80
   1  -5 -12   26.60    4.60
   1   5 -12   29.20    4.60
   1   5 -12   23.70    5.00
   0  -5 -12   -0.50    2.10
   0   5 -12   -1.60    1.90
   0   5 -12    0.10    2.60
  -1  -5 -12    6.70    2.80
  -1   5 -12    4.70    2.60
  -2  -5 -12   25.90    4.40
   2  -5  12   27.40    4.80
  -2  -5 -12   31.70    4.70
   3  -5  12    4.80    2.80
  -3  -5 -12    6.30    2.80
   3  -6 -12   22.60    4.70
   3   6 -12   19.00    5.60
   2  -6 -12   15.80    4.20
   2   6 -12   12.10    4.60
   1  -6 -12    0.10    2.70
   1   6 -12    1.10    3.40
   0  -6 -12   80.79    7.30
   0   6 -12   87.69    9.20
  -1  -6 -12   28.40    4.60
   5   0 -13   38.00    4.40
   4   0 -13   45.10    4.80
   3   0 -13   21.40    3.60
   2   0 -13   -1.00    1.40
   1   0 -13    4.10    2.00
   0   0 -13   18.30    3.30
  -1   0 -13   48.80    5.40
  -2   0 -13   25.20    4.30
  -3   0 -13    8.40    2.90
  -4   0 -13    3.90    2.70
  -5   0 -13   63.99    7.30
   7   1 -13   29.70    5.70
   6  -1 -13    0.70    2.10
   6   1 -13   -1.10    4.60
   5  -1 -13  159.78    8.00
   4  -1 -13  300.37   11.00
   4   1 -13  277.97   10.10
   3  -1 -13   77.09    5.70
   3   1 -13   80.49    5.50
   2  -1 -13   94.29    6.10
   2   1 -13  105.79    6.20
   1  -1 -13  127.49    7.00
   1   1 -13  133.29    7.10
   0  -1 -13   88.69    6.10
   0   1 -13   88.39    6.00
  -1  -1 -13   19.90    3.60
  -1   1 -13   23.70    3.80
  -2  -1 -13   12.60    3.00
  -2   1 -13   12.70    3.20
  -3  -1 -13    7.00    2.90
  -3   1 -13   17.60    3.90
  -4  -1 -13   26.30    4.40
  -4   1 -13   17.80    4.00
  -5  -1 -13    6.20    3.00
  -5   1 -13    2.90    2.90
   7   2 -13   34.40    6.40
   6  -2 -13   55.49    6.10
   6   2 -13   74.39    8.30
   5  -2 -13   59.29    6.20
   5   2 -13   65.09    7.50
   4  -2 -13   20.40    4.00
   4   2 -13   14.70    4.00
   3  -2 -13   29.90    4.20
   3   2 -13   30.40    4.80
   3   2 -13   31.90    4.10
   2  -2 -13  255.87   10.30
   2   2 -13  267.57   10.10
   1  -2 -13   69.89    5.60
   1   2 -13   73.69    5.50
   0  -2 -13   57.49    5.70
   0   2 -13   69.69    5.50
  -1  -2 -13   55.99    5.50
  -1   2 -13   63.89    6.20
  -2  -2 -13   18.10    3.70
  -2   2 -13   29.80    4.60
  -3  -2 -13   47.70    5.60
  -3   2 -13   41.60    5.80
  -4  -2 -13    2.00    2.10
  -4   2 -13    1.70    2.70
  -5   2 -13    1.80    2.80
   6  -3 -13   53.79    6.20
   6   3 -13   64.99    7.80
   5  -3 -13    6.50    3.10
   5   3 -13    3.90    3.50
   4  -3 -13    2.70    2.40
   4   3 -13   -1.20    2.70
   3  -3 -13   41.20    5.20
   3   3 -13   45.10    6.00
   2  -3 -13  105.69    7.00
   2   3 -13   87.49    7.10
   2   3 -13   90.69    6.10
   1  -3 -13   22.90    4.00
   1   3 -13   25.00    4.50
   1   3 -13   20.50    3.60
   0  -3 -13   12.50    3.20
   0   3 -13   16.80    3.50
   0   3 -13    6.50    2.80
  -1  -3 -13   48.60    5.60
  -1   3 -13   47.30    5.70
  -2  -3 -13  113.09    6.80
  -2  -3 -13  117.99    7.50
  -2   3 -13  123.39    8.20
  -3  -3 -13   41.50    5.40
  -3  -3 -13   34.90    4.70
  -3   3 -13   36.30    5.60
  -4  -3 -13   85.89   11.00
  -4  -3 -13   56.59    6.60
  -4   3 -13   46.30    6.40
   5  -4 -13   85.89    7.80
   5   4 -13   88.49    9.50
   4  -4 -13    5.90    3.10
   4   4 -13   17.50    5.20
   3  -4 -13   15.90    3.80
   3   4 -13   16.50    4.60
   2  -4 -13  124.69    8.00
   2   4 -13  106.59    8.30
   2   4 -13  103.79    6.90
   1  -4 -13   97.19    7.00
   1   4 -13   93.19    8.80
   1   4 -13   88.39    6.60
   0  -4 -13   42.90    5.30
   0   4 -13   43.50    5.70
   0   4 -13   41.40    5.70
  -1  -4 -13  120.69    7.60
  -1   4 -13  115.99    7.90
  -2  -4 -13    5.00    2.50
   2  -4  13    2.80    3.10
  -2  -4 -13    5.70    2.70
  -2   4 -13    7.10    3.30
  -3  -4 -13   24.70    4.20
  -3  -4 -13   27.40    4.50
  -3   4 -13   22.60    5.10
   4  -5 -13   25.80    5.00
   4   5 -13   30.60    6.40
   3  -5 -13  121.19    8.60
   3   5 -13  100.69   10.20
   2  -5 -13    9.10    3.40
   2   5 -13   11.70    4.30
   1  -5 -13   85.79    7.80
   1   5 -13   84.89    8.90
   1   5 -13   86.29    8.00
   0  -5 -13  104.99    7.50
   0   5 -13   91.59    8.60
   0   5 -13   96.29    9.20
  -1  -5 -13   65.89    6.70
  -1   5 -13   74.49    7.80
   2  -5  13   13.00    3.80
  -2  -5 -13   11.60    3.40
  -2  -5 -13    9.60    3.10
  -2   5 -13   10.80    3.70
   5   0 -14   24.50    4.00
   4   0 -14  173.18    8.30
   3   0 -14   12.20    3.00
   2   0 -14   29.30    4.40
   1   0 -14   26.80    4.20
   0   0 -14  102.29    6.80
  -1   0 -14    0.70    2.10
  -2   0 -14  114.59    7.60
  -3   0 -14    1.10    2.40
  -4   0 -14   11.40    3.50
   5  -1 -14  111.09    7.00
   4  -1 -14   60.79    6.10
   4   1 -14   44.30    5.00
   3  -1 -14   65.89    6.40
   3   1 -14   68.29    5.40
   2  -1 -14   33.80    4.80
   2   1 -14   35.10    4.50
   1  -1 -14   26.80    4.00
   1   1 -14   36.00    4.90
   0  -1 -14   48.90    5.60
   0   1 -14   49.10    5.50
  -1  -1 -14   84.89    6.50
  -1   1 -14   85.59    6.40
  -2  -1 -14   20.40    4.00
  -2   1 -14   29.50    5.00
  -3  -1 -14    6.90    2.80
  -3   1 -14   11.20    3.70
  -4  -1 -14   17.30    4.10
  -4   1 -14    9.20    3.50
   6  -2 -14   28.30    4.70
   5  -2 -14   70.39    6.90
   4  -2 -14   40.10    5.10
   3  -2 -14   26.80    4.40
   3   2 -14   26.00    3.90
   2  -2 -14   57.79    6.00
   2   2 -14   43.90    5.00
   1  -2 -14   17.10    3.50
   1   2 -14   20.00    3.70
   0  -2 -14   12.50    3.30
   0   2 -14   11.40    3.00
  -1  -2 -14   24.60    4.30
  -1   2 -14   21.70    4.00
  -2  -2 -14   38.10    5.20
  -2   2 -14   33.50    5.00
  -3  -2 -14   27.80    4.60
  -3   2 -14   28.90    5.10
  -4  -2 -14   27.40    4.60
  -4   2 -14   35.00    5.90
   5  -3 -14    8.80    3.30
   5   3 -14    8.20    4.00
   4  -3 -14    5.60    2.90
   4   3 -14    8.70    3.70
   3  -3 -14   -1.80    2.00
   3   3 -14   -0.80    2.50
   2  -3 -14    3.60    2.40
   2   3 -14    1.70    2.00
   1  -3 -14   23.80    4.20
   1   3 -14   32.20    4.70
   0  -3 -14  165.68    8.90
   0   3 -14  155.38    8.70
  -1  -3 -14   34.60    5.10
  -1   3 -14   27.20    4.70
  -2  -3 -14   42.70    5.70
  -2   3 -14   53.49    6.70
  -3  -3 -14   21.20    4.20
  -3   3 -14   27.20    4.90
   4  -4 -14   46.30    5.90
   4   4 -14   43.90    6.90
   3  -4 -14   15.20    3.80
   3   4 -14   14.10    4.50
   2  -4 -14   45.10    5.70
   2   4 -14   47.30    6.80
   1  -4 -14  141.39    8.70
   1   4 -14  170.78    9.20
   1   4 -14  139.79    9.30
   0  -4 -14   59.09    6.20
   0   4 -14   62.79    9.10
   0   4 -14   57.59    6.50
  -1  -4 -14  140.99    8.50
  -1   4 -14  170.28    9.80
  -2  -4 -14   16.80    3.80
  -2  -4 -14   19.30    3.90
  -2   4 -14   27.10    5.20
   2  -5 -14   43.10    5.90
   2   5 -14   57.59    8.20
   1  -5 -14  151.28    9.40
   1   5 -14  146.19   10.30
   1   5 -14  142.59   11.20
   0  -5 -14   56.39    6.50
   0   5 -14   55.09    6.80
   0   5 -14   72.79    8.20
   5   0 -15    0.80    2.00
   4   0 -15   20.30    3.80
   3   0 -15   51.69    5.70
   2   0 -15   88.99    6.70
   1   0 -15    4.60    2.60
   0   0 -15   16.40    3.80
  -1   0 -15    4.70    2.90
  -2   0 -15    7.50    3.10
  -3   0 -15    9.50    3.70
   5  -1 -15   19.40    4.00
   4  -1 -15   54.49    5.80
   4   1 -15   61.29    6.10
   3  -1 -15   17.50    3.60
   3   1 -15   13.40    3.30
   2  -1 -15   89.69    6.60
   2   1 -15   95.19    6.60
   1  -1 -15   18.10    3.80
   1   1 -15   21.70    4.10
   0  -1 -15   86.99    7.80
   0   1 -15   93.39    6.90
  -1  -1 -15   71.09    7.20
  -1   1 -15   65.59    6.90
  -2  -1 -15    7.60    3.10
  -2   1 -15    4.20    3.00
  -3  -1 -15   96.89    7.60
  -3   1 -15   96.79    8.90
   5  -2 -15   96.99    7.40
   4  -2 -15    0.10    2.10
   3  -2 -15   19.10    4.10
   3   2 -15   13.40    3.20
   2  -2 -15   20.80    4.30
   2   2 -15   31.50    4.70
   1  -2 -15   28.40    4.60
   1   2 -15   19.20    4.00
   0  -2 -15   27.30    4.70
   0   2 -15   28.00    4.80
  -1  -2 -15  146.29    8.70
  -1   2 -15  155.28    9.00
  -2  -2 -15  428.16   15.30
  -2   2 -15  405.26   15.40
  -3  -2 -15   37.90    5.50
  -3   2 -15   43.10    6.40
   4  -3 -15   28.80    4.80
   3  -3 -15    4.50    2.80
   2  -3 -15   10.60    3.30
   2   3 -15    6.60    2.60
   1  -3 -15   49.10    5.90
   1   3 -15   43.90    5.70
   0  -3 -15  108.19    7.80
   0   3 -15  126.49    8.20
  -1  -3 -15   38.10    5.60
  -1   3 -15   43.10    6.00
  -2  -3 -15   20.90    4.40
  -2   3 -15   22.30    4.60
   2  -4 -15   37.90    5.60
   1  -4 -15   24.80    4.60
   1   4 -15   23.30    4.40
   0  -4 -15   49.30    6.30
   0   4 -15   43.60    5.90
   4   0 -16   10.20    3.30
   3   0 -16  111.59    7.60
   2   0 -16   75.19    7.10
   1   0 -16    3.50    2.50
   0   0 -16   10.70    3.20
  -1   0 -16  108.59    8.30
  -2   0 -16   14.40    4.20
   4  -1 -16   61.59    6.80
   4   1 -16   82.99    6.50
   3  -1 -16   41.40    5.50
   3   1 -16   36.00    5.00
   2  -1 -16   43.70    5.70
   2   1 -16   33.80    5.00
   1  -1 -16    7.60    3.00
   1   1 -16   10.20    3.20
   0  -1 -16   25.30    4.70
   0   1 -16   29.70    4.80
  -1  -1 -16   16.40    4.00
  -1   1 -16   10.70    3.60
  -2  -1 -16   96.99    8.80
  -2   1 -16  102.99    9.20
   3  -2 -16   44.00    5.90
   3   2 -16   29.70    4.70
   2  -2 -16    9.40    3.30
   2   2 -16    4.20    2.50
   1  -2 -16   20.70    4.20
   1   2 -16   13.30    3.40
   0  -2 -16   16.60    4.40
   0   2 -16   17.60    4.10
  -1  -2 -16   18.80    4.50
  -1   2 -16   13.80    3.90
   2  -3 -16   88.99    8.80
   2   3 -16   96.59    7.30
   1  -3 -16   13.90    4.00
   1   3 -16   16.40    3.80
   0  -3 -16  120.09    9.00
   0   3 -16  122.79    8.50
   2   0 -17  198.88   10.40
   1   0 -17   37.50    5.40
   1  -1 -17   40.60    8.70
   1   1 -17   40.70    6.00

_computing_structure_solution     'SHELXT 2014/4 (Sheldrick, 2014)'
;
_shelx_hkl_checksum   71835

_publcif_info_exptl_table_max_cols 4
_publcif_info_exptl_table_use_headnotes n
loop_
_publcif_info_tables.block_id
_publcif_info_tables.reference_item
"{dd60d26f-9bf1-4a77-8778-19d911b37c34}" "_publcif_info_datablock.publ_exptl"
loop_
_publcif_info_cif.paper_type
 EX

loop_
_publcif_info_datablock.id
_publcif_info_datablock.publ_exptl
_publcif_info_datablock.publ_geom
_publcif_info_datablock.structure
'{dd60d26f-9bf1-4a77-8778-19d911b37c34}' y y y

loop_
_publcif_info_exptl_table_extra_item
sin_theta_over_lambda_max

loop_
_publcif_info_exptl_table_header_item
?
